# Supplementary material
Source: publisher figshare collection journal article supplement (https://acs.figshare.com/ndownloader/files/4766005)
Supplement: Supplementary file 1 [file 4766005]

# 1. Submission Details

_publ_contact_author_name   'Holger Braunschweig'
_publ_contact_author_address
; Institut fuer Anorganische Chemie 
  Universitaet Wuerzburg
  Am Hubland
  97074 Wuerzburg
  Germany
;
_publ_contact_author_email         'H.Braunschweig@mail.uni-wuerzburg.de'
_publ_contact_author_fax           +49-931-8884623
_publ_contact_author_phone         +49-931-8885260

_publ_requested_journal            ?
_publ_requested_category           ?
_publ_requested_coeditor_name      ?

_publ_contact_letter
; ?
;


# 2. Processing Summary (IUCr Office Use Only)

_journal_date_recd_electronic     ?
_journal_date_to_coeditor         ?
_journal_date_from_coeditor       ?
_journal_date_accepted            ?

_journal_date_printers_first      ?
_journal_date_printers_final      ?
_journal_date_proofs_out          ?
_journal_date_proofs_in           ?


_journal_coeditor_name            ?
_journal_coeditor_code            ?
_journal_coeditor_notes
; ?
;

_journal_techeditor_code          ?
_journal_techeditor_notes
; ?
;

_journal_coden_ASTM               ?
_journal_name_full                ?
_journal_year                     ?
_journal_volume                   ?

_journal_issue                    ?
_journal_page_first               ?
_journal_page_last                ?

_journal_suppl_publ_number        ?
_journal_suppl_publ_pages         ?

# 3. Title and Author List

_publ_section_title
; ?
;

# The loop structure below should contain the names  and addresses of all
# authors, in the required order of publication. Repeat as necessary.

loop_
_publ_author_name
_publ_author_address
      'Braunschweig, Holger'         #<--'Last name,  first name'
;     Institut fuer Anorganische Chemie 
      Universitaet Wuerzburg
      Am Hubland
      97074 Wuerzburg
      Germany
;
      'Lutz, Matthias'             #<--'Last name,  first name'
;     Institut fuer Anorganische Chemie 
      Universitaet Wuerzburg
      Am Hubland
      97074 Wuerzburg
      Germany
;
      'Schaumloeffel, Anu'               #<--'Last name,  first name'
;     Institut fuer Anorganische Chemie 
      Universitaet Wuerzburg
      Am Hubland
      97074 Wuerzburg
      Germany
;
      'Radacki, Krzysztof'               #<--'Last name,  first name'
;     Institut fuer Anorganische Chemie 
      Universitaet Wuerzburg
      Am Hubland
      97074 Wuerzburg
      Germany
;
      'Seeler, Fabian'               #<--'Last name,  first name'
;     Institut fuer Anorganische Chemie 
      Universitaet Wuerzburg
      Am Hubland
      97074 Wuerzburg
      Germany
;
      'Unkelbach, Christian'               #<--'Last name,  first name'
;     Institut fuer Anorganische Chemie 
      Universitaet Wuerzburg
      Am Hubland
      97074 Wuerzburg
      Germany
;
# 4. Text

_publ_section_abstract
; see text
;

_publ_section_comment
; see text
;


_publ_section_exptl_prep
; see text
;

_publ_section_exptl_refinement
; see text
;


_publ_section_references
; see text
;


_publ_section_figure_captions
; see text
;

_publ_section_table_legends
; see text
;


_publ_section_acknowledgements
; see text
;

  
data_fs028 
 
_audit_creation_method            SHELXL-97 
_chemical_name_systematic 
; 
 ? 
; 
_chemical_name_common             ?

_chemical_melting_point           ? 
_chemical_formula_moiety          
'C16 H22 B2 N2 V'  
_chemical_formula_sum 
 'C16 H22 B2 N2 V' 
_chemical_formula_weight          314.92 
 
loop_ 
 _atom_type_symbol 
 _atom_type_description 
 _atom_type_scat_dispersion_real 
 _atom_type_scat_dispersion_imag 
 _atom_type_scat_source 
 'C'  'C'   0.0033   0.0016 
 'International Tables Vol C Tables 4.2.6.8 and 6.1.1.4' 
 'H'  'H'   0.0000   0.0000 
 'International Tables Vol C Tables 4.2.6.8 and 6.1.1.4' 
 'B'  'B'   0.0013   0.0007 
 'International Tables Vol C Tables 4.2.6.8 and 6.1.1.4' 
 'N'  'N'   0.0061   0.0033 
 'International Tables Vol C Tables 4.2.6.8 and 6.1.1.4' 
 'V'  'V'   0.3005   0.5294 
 'International Tables Vol C Tables 4.2.6.8 and 6.1.1.4' 
 
_symmetry_cell_setting            orthorhombic 
_symmetry_space_group_name_H-M    P2(1)2(1)2(1)
_symmetry_space_group_name_Hall   'P 2ac 2ab'
 
loop_ 
 _symmetry_equiv_pos_as_xyz 
 'x, y, z' 
 '-x+1/2, -y, z+1/2' 
 '-x, y+1/2, -z+1/2' 
 'x+1/2, -y+1/2, -z' 
 
_cell_length_a                    10.7505(17) 
_cell_length_b                    11.7485(19) 
_cell_length_c                    12.266(2) 
_cell_angle_alpha                 90.00 
_cell_angle_beta                  90.00 
_cell_angle_gamma                 90.00 
_cell_volume                      1549.3(4) 
_cell_formula_units_Z             4 
_cell_measurement_temperature     173(2) 
_cell_measurement_reflns_used     4727 
_cell_measurement_theta_min       2.4005 
_cell_measurement_theta_max       25.6135 
 
_exptl_crystal_description        plate 
_exptl_crystal_colour             violet 
_exptl_crystal_size_max           0.22 
_exptl_crystal_size_mid           0.10 
_exptl_crystal_size_min           0.04 
_exptl_crystal_density_meas       ? 
_exptl_crystal_density_diffrn     1.350 
_exptl_crystal_density_method     'not measured' 
_exptl_crystal_F_000              660 
_exptl_absorpt_coefficient_mu     0.633 
_exptl_absorpt_correction_type    multi-scan
_exptl_absorpt_correction_T_min   0.773393 
_exptl_absorpt_correction_T_max   0.98 
_exptl_absorpt_process_details    'SadAbs2.0 (Sheldrick 2000)'
 
_exptl_special_details 
; 
 ? 
; 
 
_diffrn_ambient_temperature       173(2) 
_diffrn_radiation_wavelength      0.71073 
_diffrn_radiation_type            MoK\a 
_diffrn_radiation_source          'fine-focus sealed tube' 
_diffrn_radiation_monochromator   graphite 
_diffrn_measurement_device_type  'Bruker SMART CCD area detector'
_diffrn_measurement_method       'phi and omega scans'
_diffrn_detector_area_resol_mean  ? 
_diffrn_standards_number          ? 
_diffrn_standards_interval_count  ? 
_diffrn_standards_interval_time   ? 
_diffrn_standards_decay_%         ? 
_diffrn_reflns_number             14972 
_diffrn_reflns_av_R_equivalents   0.0473 
_diffrn_reflns_av_sigmaI/netI     0.0373 
_diffrn_reflns_limit_h_min        -13 
_diffrn_reflns_limit_h_max        13 
_diffrn_reflns_limit_k_min        -14 
_diffrn_reflns_limit_k_max        14 
_diffrn_reflns_limit_l_min        -15 
_diffrn_reflns_limit_l_max        15 
_diffrn_reflns_theta_min          2.40 
_diffrn_reflns_theta_max          26.07 
_reflns_number_total              3058 
_reflns_number_gt                 2958 
_reflns_threshold_expression      >2sigma(I) 
 
_computing_data_collection        'Smart-NT v. 5.63'
_computing_cell_refinement        'Saint-NT v. 6.45'
_computing_data_reduction         'Saint-NT v. 6.45' 
_computing_structure_solution     'SHELXS-97 (Sheldrick, 1990)' 
_computing_structure_refinement   'SHELXL-97 (Sheldrick, 1997)' 
_computing_molecular_graphics     'XP in ShelxTL-97' 
_computing_publication_material   'XP in ShelxTL-97'  
 
_refine_special_details 
; 
 Refinement of F^2^ against ALL reflections.  The weighted R-factor wR and 
 goodness of fit S are based on F^2^, conventional R-factors R are based 
 on F, with F set to zero for negative F^2^. The threshold expression of 
 F^2^ > 2sigma(F^2^) is used only for calculating R-factors(gt) etc. and is 
 not relevant to the choice of reflections for refinement.  R-factors based 
 on F^2^ are statistically about twice as large as those based on F, and R- 
 factors based on ALL data will be even larger. 
; 
 
_refine_ls_structure_factor_coef  Fsqd  
_refine_ls_matrix_type            full 
_refine_ls_weighting_scheme       calc  
_refine_ls_weighting_details 
 'calc w=1/[\s^2^(Fo^2^)+(0.0504P)^2^+0.8643P] where P=(Fo^2^+2Fc^2^)/3' 
_atom_sites_solution_primary      direct 
_atom_sites_solution_secondary    difmap 
_atom_sites_solution_hydrogens    geom 
_refine_ls_hydrogen_treatment     constr 
_refine_ls_extinction_method      none 
_refine_ls_extinction_coef        ? 
_refine_ls_abs_structure_details 
 'Flack H D (1983), Acta Cryst. A39, 876-881' 
_refine_ls_abs_structure_Flack    0.03(3) 
_refine_ls_number_reflns          3058 
_refine_ls_number_parameters      190 
_refine_ls_number_restraints      0 
_refine_ls_R_factor_all           0.0513 
_refine_ls_R_factor_gt            0.0489 
_refine_ls_wR_factor_ref          0.1117 
_refine_ls_wR_factor_gt           0.1107 
_refine_ls_goodness_of_fit_ref    1.217 
_refine_ls_restrained_S_all       1.217 
_refine_ls_shift/su_max           0.000 
_refine_ls_shift/su_mean          0.000 
 
loop_ 
 _atom_site_label 
 _atom_site_type_symbol 
 _atom_site_fract_x 
 _atom_site_fract_y 
 _atom_site_fract_z 
 _atom_site_U_iso_or_equiv 
 _atom_site_adp_type 
 _atom_site_occupancy 
 _atom_site_symmetry_multiplicity 
 _atom_site_calc_flag 
 _atom_site_refinement_flags 
 _atom_site_disorder_assembly 
 _atom_site_disorder_group 
V1 V 0.17653(5) 0.41033(4) 0.08587(4) 0.01868(15) Uani 1 1 d . . . 
N1 N 0.5570(2) 0.4223(2) 0.2021(2) 0.0225(6) Uani 1 1 d . . . 
N2 N 0.4864(3) 0.6210(2) -0.0117(2) 0.0243(6) Uani 1 1 d . . . 
C27 C 0.2161(3) 0.5633(3) 0.1769(3) 0.0213(7) Uani 1 1 d . . . 
H27A H 0.2689 0.5879 0.2343 0.026 Uiso 1 1 calc R . . 
C26 C 0.0986(3) 0.5224(3) 0.2102(3) 0.0266(8) Uani 1 1 d . . . 
H26A H 0.0836 0.5254 0.2865 0.032 Uiso 1 1 calc R . . 
C11 C 0.3647(3) 0.3321(3) 0.1070(3) 0.0237(8) Uani 1 1 d . . . 
C25 C 0.0010(3) 0.4780(3) 0.1483(3) 0.0270(8) Uani 1 1 d . . . 
H25A H -0.0686 0.4506 0.1882 0.032 Uiso 1 1 calc R . . 
C24 C -0.0074(3) 0.4687(3) 0.0333(3) 0.0278(8) Uani 1 1 d . . . 
H24A H -0.0813 0.4354 0.0054 0.033 Uiso 1 1 calc R . . 
C14 C 0.1879(4) 0.2236(3) 0.1342(3) 0.0297(8) Uani 1 1 d . . . 
H14A H 0.1215 0.1842 0.1688 0.036 Uiso 1 1 calc R . . 
B2 B 0.4157(4) 0.5557(3) 0.0596(3) 0.0217(8) Uani 1 1 d . . . 
C23 C 0.0816(3) 0.5034(3) -0.0442(3) 0.0263(8) Uani 1 1 d . . . 
H23A H 0.0578 0.4936 -0.1182 0.032 Uiso 1 1 calc R . . 
C21 C 0.2673(3) 0.5735(3) 0.0705(3) 0.0204(7) Uani 1 1 d . . . 
C42 C 0.4419(4) 0.7213(3) -0.0701(3) 0.0318(8) Uani 1 1 d . . . 
H42A H 0.3545 0.7350 -0.0515 0.048 Uiso 1 1 calc R . . 
H42B H 0.4494 0.7086 -0.1488 0.048 Uiso 1 1 calc R . . 
H42C H 0.4919 0.7875 -0.0492 0.048 Uiso 1 1 calc R . . 
C41 C 0.6161(3) 0.5973(4) -0.0377(3) 0.0338(8) Uani 1 1 d . . . 
H41A H 0.6433 0.5291 0.0016 0.051 Uiso 1 1 calc R . . 
H41B H 0.6677 0.6623 -0.0160 0.051 Uiso 1 1 calc R . . 
H41C H 0.6246 0.5847 -0.1164 0.051 Uiso 1 1 calc R . . 
C13 C 0.2078(4) 0.2322(3) 0.0210(3) 0.0300(9) Uani 1 1 d . . . 
H13A H 0.1576 0.1995 -0.0344 0.036 Uiso 1 1 calc R . . 
C12 C 0.3149(4) 0.2977(3) 0.0049(3) 0.0256(7) Uani 1 1 d . . . 
H12A H 0.3493 0.3165 -0.0641 0.031 Uiso 1 1 calc R . . 
C22 C 0.2008(3) 0.5506(3) -0.0279(3) 0.0220(7) Uani 1 1 d . . . 
H22A H 0.2437 0.5705 -0.0928 0.026 Uiso 1 1 calc R . . 
B1 B 0.4599(3) 0.4338(3) 0.1279(3) 0.0195(8) Uani 1 1 d . . . 
C32 C 0.5887(4) 0.3170(3) 0.2598(3) 0.0333(9) Uani 1 1 d . . . 
H32A H 0.5309 0.2566 0.2381 0.050 Uiso 1 1 calc R . . 
H32B H 0.5825 0.3295 0.3386 0.050 Uiso 1 1 calc R . . 
H32C H 0.6738 0.2945 0.2412 0.050 Uiso 1 1 calc R . . 
C15 C 0.2840(3) 0.2836(3) 0.1872(3) 0.0242(8) Uani 1 1 d . . . 
H15A H 0.2936 0.2908 0.2639 0.029 Uiso 1 1 calc R . . 
C31 C 0.6398(3) 0.5153(3) 0.2310(3) 0.0308(8) Uani 1 1 d . . . 
H31A H 0.6152 0.5841 0.1913 0.046 Uiso 1 1 calc R . . 
H31B H 0.7254 0.4950 0.2116 0.046 Uiso 1 1 calc R . . 
H31C H 0.6347 0.5296 0.3096 0.046 Uiso 1 1 calc R . . 
 
loop_ 
 _atom_site_aniso_label 
 _atom_site_aniso_U_11 
 _atom_site_aniso_U_22 
 _atom_site_aniso_U_33 
 _atom_site_aniso_U_23 
 _atom_site_aniso_U_13 
 _atom_site_aniso_U_12 
V1 0.0174(2) 0.0166(3) 0.0221(3) 0.0006(2) -0.0027(2) 0.0003(2) 
N1 0.0191(13) 0.0224(15) 0.0260(14) -0.0033(12) -0.0006(11) 0.0057(12) 
N2 0.0232(15) 0.0237(16) 0.0259(15) 0.0009(12) -0.0015(12) -0.0043(11) 
C27 0.0272(18) 0.0134(16) 0.0233(16) -0.0018(13) -0.0020(14) -0.0005(13) 
C26 0.031(2) 0.0270(19) 0.0222(17) 0.0025(14) 0.0031(15) 0.0088(15) 
C11 0.0235(16) 0.0151(15) 0.033(2) -0.0024(14) -0.0038(14) 0.0063(13) 
C25 0.0189(17) 0.027(2) 0.035(2) 0.0091(16) 0.0042(15) 0.0017(14) 
C24 0.0196(17) 0.0269(19) 0.037(2) 0.0054(16) -0.0042(15) 0.0012(14) 
C14 0.0260(18) 0.0182(16) 0.045(2) 0.0050(15) -0.0020(18) 0.0012(16) 
B2 0.0236(19) 0.0185(18) 0.0229(19) -0.0053(14) -0.0043(14) 0.0007(14) 
C23 0.0275(19) 0.0243(18) 0.0272(18) 0.0038(15) -0.0068(14) 0.0055(15) 
C21 0.0236(15) 0.0129(15) 0.0248(17) 0.0024(14) 0.0010(13) 0.0003(12) 
C42 0.036(2) 0.0261(18) 0.033(2) 0.0053(16) -0.0025(17) -0.0072(15) 
C41 0.0301(19) 0.036(2) 0.0354(19) 0.0004(18) 0.0070(15) -0.0072(18) 
C13 0.036(2) 0.0179(17) 0.036(2) -0.0054(15) -0.0104(17) -0.0013(15) 
C12 0.0291(18) 0.0206(16) 0.0270(17) -0.0061(14) -0.0048(16) 0.0038(16) 
C22 0.0247(19) 0.0209(16) 0.0203(16) 0.0044(13) -0.0016(13) 0.0031(13) 
B1 0.0231(18) 0.0194(19) 0.0161(16) -0.0033(14) 0.0084(14) 0.0043(15) 
C32 0.034(2) 0.032(2) 0.034(2) 0.0045(17) -0.0075(17) 0.0078(16) 
C15 0.0289(19) 0.0138(15) 0.0297(19) 0.0017(14) -0.0028(15) 0.0036(14) 
C31 0.0228(18) 0.038(2) 0.031(2) -0.0078(17) -0.0009(14) -0.0026(15) 
 
_geom_special_details 
; 
 All esds (except the esd in the dihedral angle between two l.s. planes) 
 are estimated using the full covariance matrix.  The cell esds are taken 
 into account individually in the estimation of esds in distances, angles 
 and torsion angles; correlations between esds in cell parameters are only 
 used when they are defined by crystal symmetry.  An approximate (isotropic) 
 treatment of cell esds is used for estimating esds involving l.s. planes. 
; 
 
loop_ 
 _geom_bond_atom_site_label_1 
 _geom_bond_atom_site_label_2 
 _geom_bond_distance 
 _geom_bond_site_symmetry_2 
 _geom_bond_publ_flag 
V1 C27 2.158(3) . ? 
V1 C21 2.159(3) . ? 
V1 C22 2.175(3) . ? 
V1 C26 2.182(4) . ? 
V1 C25 2.186(4) . ? 
V1 C23 2.187(3) . ? 
V1 C24 2.190(4) . ? 
V1 C12 2.225(4) . ? 
V1 C11 2.237(3) . ? 
V1 C15 2.257(3) . ? 
V1 C13 2.264(4) . ? 
V1 C14 2.276(3) . ? 
N1 B1 1.392(5) . ? 
N1 C31 1.454(5) . ? 
N1 C32 1.465(4) . ? 
N2 B2 1.390(5) . ? 
N2 C41 1.457(5) . ? 
N2 C42 1.459(5) . ? 
C27 C26 1.412(5) . ? 
C27 C21 1.422(5) . ? 
C27 H27A 0.9500 . ? 
C26 C25 1.397(5) . ? 
C26 H26A 0.9500 . ? 
C11 C12 1.420(5) . ? 
C11 C15 1.430(5) . ? 
C11 B1 1.594(5) . ? 
C25 C24 1.417(5) . ? 
C25 H25A 0.9500 . ? 
C24 C23 1.409(5) . ? 
C24 H24A 0.9500 . ? 
C14 C13 1.409(5) . ? 
C14 C15 1.409(5) . ? 
C14 H14A 0.9500 . ? 
B2 C21 1.614(5) . ? 
B2 B1 1.725(5) . ? 
C23 C22 1.411(5) . ? 
C23 H23A 0.9500 . ? 
C21 C22 1.428(5) . ? 
C42 H42A 0.9800 . ? 
C42 H42B 0.9800 . ? 
C42 H42C 0.9800 . ? 
C41 H41A 0.9800 . ? 
C41 H41B 0.9800 . ? 
C41 H41C 0.9800 . ? 
C13 C12 1.399(5) . ? 
C13 H13A 0.9500 . ? 
C12 H12A 0.9500 . ? 
C22 H22A 0.9500 . ? 
C32 H32A 0.9800 . ? 
C32 H32B 0.9800 . ? 
C32 H32C 0.9800 . ? 
C15 H15A 0.9500 . ? 
C31 H31A 0.9800 . ? 
C31 H31B 0.9800 . ? 
C31 H31C 0.9800 . ? 
 
loop_ 
 _geom_angle_atom_site_label_1 
 _geom_angle_atom_site_label_2 
 _geom_angle_atom_site_label_3 
 _geom_angle 
 _geom_angle_site_symmetry_1 
 _geom_angle_site_symmetry_3 
 _geom_angle_publ_flag 
C27 V1 C21 38.46(12) . . ? 
C27 V1 C22 71.16(12) . . ? 
C21 V1 C22 38.47(12) . . ? 
C27 V1 C26 37.97(14) . . ? 
C21 V1 C26 72.51(13) . . ? 
C22 V1 C26 92.14(13) . . ? 
C27 V1 C25 71.70(13) . . ? 
C21 V1 C25 95.63(13) . . ? 
C22 V1 C25 92.99(13) . . ? 
C26 V1 C25 37.29(14) . . ? 
C27 V1 C23 93.03(13) . . ? 
C21 V1 C23 72.75(13) . . ? 
C22 V1 C23 37.73(13) . . ? 
C26 V1 C23 91.67(13) . . ? 
C25 V1 C23 70.76(14) . . ? 
C27 V1 C24 93.97(14) . . ? 
C21 V1 C24 96.00(13) . . ? 
C22 V1 C24 71.46(13) . . ? 
C26 V1 C24 70.73(14) . . ? 
C25 V1 C24 37.77(13) . . ? 
C23 V1 C24 37.56(13) . . ? 
C27 V1 C12 126.47(13) . . ? 
C21 V1 C12 100.74(13) . . ? 
C22 V1 C12 94.83(13) . . ? 
C26 V1 C12 158.05(14) . . ? 
C25 V1 C12 161.77(14) . . ? 
C23 V1 C12 106.49(13) . . ? 
C24 V1 C12 131.21(14) . . ? 
C27 V1 C11 95.99(13) . . ? 
C21 V1 C11 88.05(12) . . ? 
C22 V1 C11 106.10(13) . . ? 
C26 V1 C11 120.95(13) . . ? 
C25 V1 C11 152.82(14) . . ? 
C23 V1 C11 135.40(14) . . ? 
C24 V1 C11 168.32(14) . . ? 
C12 V1 C11 37.12(13) . . ? 
C27 V1 C15 99.42(13) . . ? 
C21 V1 C15 113.72(13) . . ? 
C22 V1 C15 142.34(13) . . ? 
C26 V1 C15 102.09(13) . . ? 
C25 V1 C15 119.27(13) . . ? 
C23 V1 C15 165.99(13) . . ? 
C24 V1 C15 146.17(14) . . ? 
C12 V1 C15 60.75(13) . . ? 
C11 V1 C15 37.11(13) . . ? 
C27 V1 C13 157.28(13) . . ? 
C21 V1 C13 136.27(13) . . ? 
C22 V1 C13 117.21(14) . . ? 
C26 V1 C13 149.35(15) . . ? 
C25 V1 C13 125.98(14) . . ? 
C23 V1 C13 105.97(14) . . ? 
C24 V1 C13 108.68(14) . . ? 
C12 V1 C13 36.31(13) . . ? 
C11 V1 C13 61.74(13) . . ? 
C15 V1 C13 60.52(13) . . ? 
C27 V1 C14 131.10(14) . . ? 
C21 V1 C14 148.66(13) . . ? 
C22 V1 C14 153.03(14) . . ? 
C26 V1 C14 114.83(14) . . ? 
C25 V1 C14 107.81(14) . . ? 
C23 V1 C14 134.20(14) . . ? 
C24 V1 C14 115.29(14) . . ? 
C12 V1 C14 60.48(13) . . ? 
C11 V1 C14 61.65(13) . . ? 
C15 V1 C14 36.22(13) . . ? 
C13 V1 C14 36.16(13) . . ? 
B1 N1 C31 123.1(3) . . ? 
B1 N1 C32 124.9(3) . . ? 
C31 N1 C32 112.0(3) . . ? 
B2 N2 C41 123.8(3) . . ? 
B2 N2 C42 125.1(3) . . ? 
C41 N2 C42 111.1(3) . . ? 
C26 C27 C21 129.9(3) . . ? 
C26 C27 V1 71.9(2) . . ? 
C21 C27 V1 70.80(18) . . ? 
C26 C27 H27A 115.1 . . ? 
C21 C27 H27A 115.1 . . ? 
V1 C27 H27A 139.0 . . ? 
C25 C26 C27 129.9(3) . . ? 
C25 C26 V1 71.5(2) . . ? 
C27 C26 V1 70.1(2) . . ? 
C25 C26 H26A 115.0 . . ? 
C27 C26 H26A 115.0 . . ? 
V1 C26 H26A 140.9 . . ? 
C12 C11 C15 105.3(3) . . ? 
C12 C11 B1 126.6(3) . . ? 
C15 C11 B1 125.3(3) . . ? 
C12 C11 V1 71.0(2) . . ? 
C15 C11 V1 72.20(19) . . ? 
B1 C11 V1 106.9(2) . . ? 
C26 C25 C24 128.2(3) . . ? 
C26 C25 V1 71.2(2) . . ? 
C24 C25 V1 71.3(2) . . ? 
C26 C25 H25A 115.9 . . ? 
C24 C25 H25A 115.9 . . ? 
V1 C25 H25A 137.5 . . ? 
C23 C24 C25 127.3(4) . . ? 
C23 C24 V1 71.1(2) . . ? 
C25 C24 V1 71.0(2) . . ? 
C23 C24 H24A 116.3 . . ? 
C25 C24 H24A 116.3 . . ? 
V1 C24 H24A 137.1 . . ? 
C13 C14 C15 107.9(4) . . ? 
C13 C14 V1 71.4(2) . . ? 
C15 C14 V1 71.15(19) . . ? 
C13 C14 H14A 126.1 . . ? 
C15 C14 H14A 126.1 . . ? 
V1 C14 H14A 123.0 . . ? 
N2 B2 C21 121.4(3) . . ? 
N2 B2 B1 127.8(3) . . ? 
C21 B2 B1 109.8(3) . . ? 
C24 C23 C22 129.4(3) . . ? 
C24 C23 V1 71.3(2) . . ? 
C22 C23 V1 70.7(2) . . ? 
C24 C23 H23A 115.3 . . ? 
C22 C23 H23A 115.3 . . ? 
V1 C23 H23A 139.6 . . ? 
C27 C21 C22 124.4(3) . . ? 
C27 C21 B2 116.6(3) . . ? 
C22 C21 B2 113.6(3) . . ? 
C27 C21 V1 70.74(18) . . ? 
C22 C21 V1 71.37(18) . . ? 
B2 C21 V1 109.8(2) . . ? 
N2 C42 H42A 109.5 . . ? 
N2 C42 H42B 109.5 . . ? 
H42A C42 H42B 109.5 . . ? 
N2 C42 H42C 109.5 . . ? 
H42A C42 H42C 109.5 . . ? 
H42B C42 H42C 109.5 . . ? 
N2 C41 H41A 109.5 . . ? 
N2 C41 H41B 109.5 . . ? 
H41A C41 H41B 109.5 . . ? 
N2 C41 H41C 109.5 . . ? 
H41A C41 H41C 109.5 . . ? 
H41B C41 H41C 109.5 . . ? 
C12 C13 C14 107.7(3) . . ? 
C12 C13 V1 70.3(2) . . ? 
C14 C13 V1 72.4(2) . . ? 
C12 C13 H13A 126.2 . . ? 
C14 C13 H13A 126.2 . . ? 
V1 C13 H13A 122.8 . . ? 
C13 C12 C11 110.0(3) . . ? 
C13 C12 V1 73.4(2) . . ? 
C11 C12 V1 71.92(19) . . ? 
C13 C12 H12A 125.0 . . ? 
C11 C12 H12A 125.0 . . ? 
V1 C12 H12A 121.3 . . ? 
C23 C22 C21 130.5(3) . . ? 
C23 C22 V1 71.6(2) . . ? 
C21 C22 V1 70.16(18) . . ? 
C23 C22 H22A 114.8 . . ? 
C21 C22 H22A 114.8 . . ? 
V1 C22 H22A 141.4 . . ? 
N1 B1 C11 120.9(3) . . ? 
N1 B1 B2 127.3(3) . . ? 
C11 B1 B2 111.5(3) . . ? 
N1 C32 H32A 109.5 . . ? 
N1 C32 H32B 109.5 . . ? 
H32A C32 H32B 109.5 . . ? 
N1 C32 H32C 109.5 . . ? 
H32A C32 H32C 109.5 . . ? 
H32B C32 H32C 109.5 . . ? 
C14 C15 C11 109.1(3) . . ? 
C14 C15 V1 72.6(2) . . ? 
C11 C15 V1 70.69(19) . . ? 
C14 C15 H15A 125.5 . . ? 
C11 C15 H15A 125.5 . . ? 
V1 C15 H15A 122.8 . . ? 
N1 C31 H31A 109.5 . . ? 
N1 C31 H31B 109.5 . . ? 
H31A C31 H31B 109.5 . . ? 
N1 C31 H31C 109.5 . . ? 
H31A C31 H31C 109.5 . . ? 
H31B C31 H31C 109.5 . . ? 
 
loop_ 
 _geom_torsion_atom_site_label_1 
 _geom_torsion_atom_site_label_2 
 _geom_torsion_atom_site_label_3 
 _geom_torsion_atom_site_label_4 
 _geom_torsion 
 _geom_torsion_site_symmetry_1 
 _geom_torsion_site_symmetry_2 
 _geom_torsion_site_symmetry_3 
 _geom_torsion_site_symmetry_4 
 _geom_torsion_publ_flag 
C21 V1 C27 C26 145.9(3) . . . . ? 
C22 V1 C27 C26 120.1(2) . . . . ? 
C25 V1 C27 C26 20.2(2) . . . . ? 
C23 V1 C27 C26 88.8(2) . . . . ? 
C24 V1 C27 C26 51.2(2) . . . . ? 
C12 V1 C27 C26 -158.06(19) . . . . ? 
C11 V1 C27 C26 -134.9(2) . . . . ? 
C15 V1 C27 C26 -97.6(2) . . . . ? 
C13 V1 C27 C26 -124.1(4) . . . . ? 
C14 V1 C27 C26 -77.7(3) . . . . ? 
C22 V1 C27 C21 -25.78(18) . . . . ? 
C26 V1 C27 C21 -145.9(3) . . . . ? 
C25 V1 C27 C21 -125.6(2) . . . . ? 
C23 V1 C27 C21 -57.0(2) . . . . ? 
C24 V1 C27 C21 -94.7(2) . . . . ? 
C12 V1 C27 C21 56.1(2) . . . . ? 
C11 V1 C27 C21 79.2(2) . . . . ? 
C15 V1 C27 C21 116.5(2) . . . . ? 
C13 V1 C27 C21 90.1(4) . . . . ? 
C14 V1 C27 C21 136.4(2) . . . . ? 
C21 C27 C26 C25 1.6(6) . . . . ? 
V1 C27 C26 C25 -42.1(4) . . . . ? 
C21 C27 C26 V1 43.7(3) . . . . ? 
C27 V1 C26 C25 147.2(3) . . . . ? 
C21 V1 C26 C25 125.7(2) . . . . ? 
C22 V1 C26 C25 92.1(2) . . . . ? 
C23 V1 C26 C25 54.4(2) . . . . ? 
C24 V1 C26 C25 22.6(2) . . . . ? 
C12 V1 C26 C25 -159.3(3) . . . . ? 
C11 V1 C26 C25 -157.6(2) . . . . ? 
C15 V1 C26 C25 -123.0(2) . . . . ? 
C13 V1 C26 C25 -71.7(3) . . . . ? 
C14 V1 C26 C25 -87.1(2) . . . . ? 
C21 V1 C26 C27 -21.5(2) . . . . ? 
C22 V1 C26 C27 -55.0(2) . . . . ? 
C25 V1 C26 C27 -147.2(3) . . . . ? 
C23 V1 C26 C27 -92.8(2) . . . . ? 
C24 V1 C26 C27 -124.5(2) . . . . ? 
C12 V1 C26 C27 53.5(4) . . . . ? 
C11 V1 C26 C27 55.2(2) . . . . ? 
C15 V1 C26 C27 89.9(2) . . . . ? 
C13 V1 C26 C27 141.1(3) . . . . ? 
C14 V1 C26 C27 125.8(2) . . . . ? 
C27 V1 C11 C12 -148.4(2) . . . . ? 
C21 V1 C11 C12 -110.7(2) . . . . ? 
C22 V1 C11 C12 -76.3(2) . . . . ? 
C26 V1 C11 C12 -178.9(2) . . . . ? 
C25 V1 C11 C12 150.7(3) . . . . ? 
C23 V1 C11 C12 -47.9(3) . . . . ? 
C24 V1 C11 C12 -0.1(8) . . . . ? 
C15 V1 C11 C12 113.9(3) . . . . ? 
C13 V1 C11 C12 36.3(2) . . . . ? 
C14 V1 C11 C12 77.6(2) . . . . ? 
C27 V1 C11 C15 97.7(2) . . . . ? 
C21 V1 C11 C15 135.4(2) . . . . ? 
C22 V1 C11 C15 169.79(19) . . . . ? 
C26 V1 C11 C15 67.2(2) . . . . ? 
C25 V1 C11 C15 36.8(4) . . . . ? 
C23 V1 C11 C15 -161.8(2) . . . . ? 
C24 V1 C11 C15 -114.0(7) . . . . ? 
C12 V1 C11 C15 -113.9(3) . . . . ? 
C13 V1 C11 C15 -77.6(2) . . . . ? 
C14 V1 C11 C15 -36.3(2) . . . . ? 
C27 V1 C11 B1 -24.7(2) . . . . ? 
C21 V1 C11 B1 13.0(2) . . . . ? 
C22 V1 C11 B1 47.4(2) . . . . ? 
C26 V1 C11 B1 -55.2(3) . . . . ? 
C25 V1 C11 B1 -85.6(3) . . . . ? 
C23 V1 C11 B1 75.8(3) . . . . ? 
C24 V1 C11 B1 123.6(6) . . . . ? 
C12 V1 C11 B1 123.7(3) . . . . ? 
C15 V1 C11 B1 -122.4(3) . . . . ? 
C13 V1 C11 B1 160.0(3) . . . . ? 
C14 V1 C11 B1 -158.7(3) . . . . ? 
C27 C26 C25 C24 -3.9(7) . . . . ? 
V1 C26 C25 C24 -45.6(4) . . . . ? 
C27 C26 C25 V1 41.6(4) . . . . ? 
C27 V1 C25 C26 -20.6(2) . . . . ? 
C21 V1 C25 C26 -51.1(2) . . . . ? 
C22 V1 C25 C26 -89.6(2) . . . . ? 
C23 V1 C25 C26 -120.6(2) . . . . ? 
C24 V1 C25 C26 -143.6(3) . . . . ? 
C12 V1 C25 C26 155.1(4) . . . . ? 
C11 V1 C25 C26 45.6(4) . . . . ? 
C15 V1 C25 C26 70.1(2) . . . . ? 
C13 V1 C25 C26 143.3(2) . . . . ? 
C14 V1 C25 C26 107.8(2) . . . . ? 
C27 V1 C25 C24 123.1(2) . . . . ? 
C21 V1 C25 C24 92.5(2) . . . . ? 
C22 V1 C25 C24 54.0(2) . . . . ? 
C26 V1 C25 C24 143.6(3) . . . . ? 
C23 V1 C25 C24 23.0(2) . . . . ? 
C12 V1 C25 C24 -61.3(5) . . . . ? 
C11 V1 C25 C24 -170.7(3) . . . . ? 
C15 V1 C25 C24 -146.2(2) . . . . ? 
C13 V1 C25 C24 -73.1(3) . . . . ? 
C14 V1 C25 C24 -108.5(2) . . . . ? 
C26 C25 C24 C23 -0.5(7) . . . . ? 
V1 C25 C24 C23 -46.1(4) . . . . ? 
C26 C25 C24 V1 45.6(4) . . . . ? 
C27 V1 C24 C23 89.8(2) . . . . ? 
C21 V1 C24 C23 51.3(2) . . . . ? 
C22 V1 C24 C23 21.2(2) . . . . ? 
C26 V1 C24 C23 120.4(2) . . . . ? 
C25 V1 C24 C23 142.7(3) . . . . ? 
C12 V1 C24 C23 -58.7(3) . . . . ? 
C11 V1 C24 C23 -58.6(7) . . . . ? 
C15 V1 C24 C23 -156.7(2) . . . . ? 
C13 V1 C24 C23 -92.1(2) . . . . ? 
C14 V1 C24 C23 -130.6(2) . . . . ? 
C27 V1 C24 C25 -52.9(2) . . . . ? 
C21 V1 C24 C25 -91.5(2) . . . . ? 
C22 V1 C24 C25 -121.5(3) . . . . ? 
C26 V1 C24 C25 -22.4(2) . . . . ? 
C23 V1 C24 C25 -142.7(3) . . . . ? 
C12 V1 C24 C25 158.6(2) . . . . ? 
C11 V1 C24 C25 158.7(6) . . . . ? 
C15 V1 C24 C25 60.6(3) . . . . ? 
C13 V1 C24 C25 125.2(2) . . . . ? 
C14 V1 C24 C25 86.7(2) . . . . ? 
C27 V1 C14 C13 -151.7(2) . . . . ? 
C21 V1 C14 C13 -96.2(3) . . . . ? 
C22 V1 C14 C13 -11.4(4) . . . . ? 
C26 V1 C14 C13 166.8(2) . . . . ? 
C25 V1 C14 C13 127.3(2) . . . . ? 
C23 V1 C14 C13 47.1(3) . . . . ? 
C24 V1 C14 C13 87.4(3) . . . . ? 
C12 V1 C14 C13 -37.4(2) . . . . ? 
C11 V1 C14 C13 -80.0(2) . . . . ? 
C15 V1 C14 C13 -117.2(3) . . . . ? 
C27 V1 C14 C15 -34.6(3) . . . . ? 
C21 V1 C14 C15 21.0(4) . . . . ? 
C22 V1 C14 C15 105.7(3) . . . . ? 
C26 V1 C14 C15 -76.0(2) . . . . ? 
C25 V1 C14 C15 -115.5(2) . . . . ? 
C23 V1 C14 C15 164.3(2) . . . . ? 
C24 V1 C14 C15 -155.5(2) . . . . ? 
C12 V1 C14 C15 79.8(2) . . . . ? 
C11 V1 C14 C15 37.2(2) . . . . ? 
C13 V1 C14 C15 117.2(3) . . . . ? 
C41 N2 B2 C21 -170.0(3) . . . . ? 
C42 N2 B2 C21 10.0(5) . . . . ? 
C41 N2 B2 B1 -2.3(5) . . . . ? 
C42 N2 B2 B1 177.7(3) . . . . ? 
C25 C24 C23 C22 2.9(7) . . . . ? 
V1 C24 C23 C22 -43.2(4) . . . . ? 
C25 C24 C23 V1 46.1(4) . . . . ? 
C27 V1 C23 C24 -92.6(2) . . . . ? 
C21 V1 C23 C24 -125.7(2) . . . . ? 
C22 V1 C23 C24 -145.9(3) . . . . ? 
C26 V1 C23 C24 -54.6(2) . . . . ? 
C25 V1 C23 C24 -23.1(2) . . . . ? 
C12 V1 C23 C24 137.9(2) . . . . ? 
C11 V1 C23 C24 165.8(2) . . . . ? 
C15 V1 C23 C24 114.6(6) . . . . ? 
C13 V1 C23 C24 100.0(2) . . . . ? 
C14 V1 C23 C24 73.3(3) . . . . ? 
C27 V1 C23 C22 53.4(2) . . . . ? 
C21 V1 C23 C22 20.2(2) . . . . ? 
C26 V1 C23 C22 91.3(2) . . . . ? 
C25 V1 C23 C22 122.8(2) . . . . ? 
C24 V1 C23 C22 145.9(3) . . . . ? 
C12 V1 C23 C22 -76.2(2) . . . . ? 
C11 V1 C23 C22 -48.3(3) . . . . ? 
C15 V1 C23 C22 -99.5(6) . . . . ? 
C13 V1 C23 C22 -114.0(2) . . . . ? 
C14 V1 C23 C22 -140.8(2) . . . . ? 
C26 C27 C21 C22 5.4(5) . . . . ? 
V1 C27 C21 C22 49.5(3) . . . . ? 
C26 C27 C21 B2 -147.1(4) . . . . ? 
V1 C27 C21 B2 -103.1(3) . . . . ? 
C26 C27 C21 V1 -44.0(3) . . . . ? 
N2 B2 C21 C27 -142.1(3) . . . . ? 
B1 B2 C21 C27 48.2(4) . . . . ? 
N2 B2 C21 C22 62.4(4) . . . . ? 
B1 B2 C21 C22 -107.3(3) . . . . ? 
N2 B2 C21 V1 140.1(3) . . . . ? 
B1 B2 C21 V1 -29.6(3) . . . . ? 
C22 V1 C21 C27 138.6(3) . . . . ? 
C26 V1 C21 C27 21.2(2) . . . . ? 
C25 V1 C21 C27 50.9(2) . . . . ? 
C23 V1 C21 C27 118.7(2) . . . . ? 
C24 V1 C21 C27 88.8(2) . . . . ? 
C12 V1 C21 C27 -137.2(2) . . . . ? 
C11 V1 C21 C27 -102.2(2) . . . . ? 
C15 V1 C21 C27 -74.6(2) . . . . ? 
C13 V1 C21 C27 -146.0(2) . . . . ? 
C14 V1 C21 C27 -88.0(3) . . . . ? 
C27 V1 C21 C22 -138.6(3) . . . . ? 
C26 V1 C21 C22 -117.4(2) . . . . ? 
C25 V1 C21 C22 -87.7(2) . . . . ? 
C23 V1 C21 C22 -19.9(2) . . . . ? 
C24 V1 C21 C22 -49.8(2) . . . . ? 
C12 V1 C21 C22 84.2(2) . . . . ? 
C11 V1 C21 C22 119.3(2) . . . . ? 
C15 V1 C21 C22 146.83(19) . . . . ? 
C13 V1 C21 C22 75.4(3) . . . . ? 
C14 V1 C21 C22 133.4(3) . . . . ? 
C27 V1 C21 B2 112.3(3) . . . . ? 
C22 V1 C21 B2 -109.2(3) . . . . ? 
C26 V1 C21 B2 133.5(3) . . . . ? 
C25 V1 C21 B2 163.1(2) . . . . ? 
C23 V1 C21 B2 -129.0(3) . . . . ? 
C24 V1 C21 B2 -158.9(2) . . . . ? 
C12 V1 C21 B2 -25.0(2) . . . . ? 
C11 V1 C21 B2 10.1(2) . . . . ? 
C15 V1 C21 B2 37.7(3) . . . . ? 
C13 V1 C21 B2 -33.8(3) . . . . ? 
C14 V1 C21 B2 24.3(4) . . . . ? 
C15 C14 C13 C12 -0.4(4) . . . . ? 
V1 C14 C13 C12 61.8(3) . . . . ? 
C15 C14 C13 V1 -62.2(2) . . . . ? 
C27 V1 C13 C12 -49.4(4) . . . . ? 
C21 V1 C13 C12 14.7(3) . . . . ? 
C22 V1 C13 C12 57.3(2) . . . . ? 
C26 V1 C13 C12 -140.9(3) . . . . ? 
C25 V1 C13 C12 173.8(2) . . . . ? 
C23 V1 C13 C12 96.3(2) . . . . ? 
C24 V1 C13 C12 135.6(2) . . . . ? 
C11 V1 C13 C12 -37.1(2) . . . . ? 
C15 V1 C13 C12 -79.7(2) . . . . ? 
C14 V1 C13 C12 -116.9(3) . . . . ? 
C27 V1 C13 C14 67.5(4) . . . . ? 
C21 V1 C13 C14 131.6(2) . . . . ? 
C22 V1 C13 C14 174.2(2) . . . . ? 
C26 V1 C13 C14 -24.0(4) . . . . ? 
C25 V1 C13 C14 -69.3(3) . . . . ? 
C23 V1 C13 C14 -146.9(2) . . . . ? 
C24 V1 C13 C14 -107.6(2) . . . . ? 
C12 V1 C13 C14 116.9(3) . . . . ? 
C11 V1 C13 C14 79.7(3) . . . . ? 
C15 V1 C13 C14 37.1(2) . . . . ? 
C14 C13 C12 C11 -0.2(4) . . . . ? 
V1 C13 C12 C11 63.0(2) . . . . ? 
C14 C13 C12 V1 -63.2(3) . . . . ? 
C15 C11 C12 C13 0.6(4) . . . . ? 
B1 C11 C12 C13 -161.2(3) . . . . ? 
V1 C11 C12 C13 -63.9(3) . . . . ? 
C15 C11 C12 V1 64.5(2) . . . . ? 
B1 C11 C12 V1 -97.3(3) . . . . ? 
C27 V1 C12 C13 158.6(2) . . . . ? 
C21 V1 C12 C13 -169.7(2) . . . . ? 
C22 V1 C12 C13 -131.3(2) . . . . ? 
C26 V1 C12 C13 120.7(4) . . . . ? 
C25 V1 C12 C13 -16.2(5) . . . . ? 
C23 V1 C12 C13 -94.7(2) . . . . ? 
C24 V1 C12 C13 -61.8(3) . . . . ? 
C11 V1 C12 C13 118.2(3) . . . . ? 
C15 V1 C12 C13 79.0(2) . . . . ? 
C14 V1 C12 C13 37.2(2) . . . . ? 
C27 V1 C12 C11 40.4(3) . . . . ? 
C21 V1 C12 C11 72.1(2) . . . . ? 
C22 V1 C12 C11 110.5(2) . . . . ? 
C26 V1 C12 C11 2.4(5) . . . . ? 
C25 V1 C12 C11 -134.5(4) . . . . ? 
C23 V1 C12 C11 147.1(2) . . . . ? 
C24 V1 C12 C11 180.0(2) . . . . ? 
C15 V1 C12 C11 -39.2(2) . . . . ? 
C13 V1 C12 C11 -118.2(3) . . . . ? 
C14 V1 C12 C11 -81.0(2) . . . . ? 
C24 C23 C22 C21 2.3(6) . . . . ? 
V1 C23 C22 C21 -41.0(3) . . . . ? 
C24 C23 C22 V1 43.4(4) . . . . ? 
C27 C21 C22 C23 -7.7(6) . . . . ? 
B2 C21 C22 C23 145.6(4) . . . . ? 
V1 C21 C22 C23 41.5(4) . . . . ? 
C27 C21 C22 V1 -49.2(3) . . . . ? 
B2 C21 C22 V1 104.1(3) . . . . ? 
C27 V1 C22 C23 -122.2(2) . . . . ? 
C21 V1 C22 C23 -147.9(3) . . . . ? 
C26 V1 C22 C23 -90.0(2) . . . . ? 
C25 V1 C22 C23 -52.6(2) . . . . ? 
C24 V1 C22 C23 -21.1(2) . . . . ? 
C12 V1 C22 C23 110.9(2) . . . . ? 
C11 V1 C22 C23 146.9(2) . . . . ? 
C15 V1 C22 C23 157.0(2) . . . . ? 
C13 V1 C22 C23 80.8(2) . . . . ? 
C14 V1 C22 C23 88.4(3) . . . . ? 
C27 V1 C22 C21 25.77(18) . . . . ? 
C26 V1 C22 C21 58.0(2) . . . . ? 
C25 V1 C22 C21 95.3(2) . . . . ? 
C23 V1 C22 C21 147.9(3) . . . . ? 
C24 V1 C22 C21 126.8(2) . . . . ? 
C12 V1 C22 C21 -101.2(2) . . . . ? 
C11 V1 C22 C21 -65.2(2) . . . . ? 
C15 V1 C22 C21 -55.1(3) . . . . ? 
C13 V1 C22 C21 -131.2(2) . . . . ? 
C14 V1 C22 C21 -123.7(3) . . . . ? 
C31 N1 B1 C11 -174.7(3) . . . . ? 
C32 N1 B1 C11 5.6(5) . . . . ? 
C31 N1 B1 B2 -1.8(5) . . . . ? 
C32 N1 B1 B2 178.5(3) . . . . ? 
C12 C11 B1 N1 -139.7(3) . . . . ? 
C15 C11 B1 N1 61.9(4) . . . . ? 
V1 C11 B1 N1 141.7(3) . . . . ? 
C12 C11 B1 B2 46.3(4) . . . . ? 
C15 C11 B1 B2 -112.0(4) . . . . ? 
V1 C11 B1 B2 -32.2(3) . . . . ? 
N2 B2 B1 N1 59.9(5) . . . . ? 
C21 B2 B1 N1 -131.3(3) . . . . ? 
N2 B2 B1 C11 -126.7(4) . . . . ? 
C21 B2 B1 C11 42.2(4) . . . . ? 
C13 C14 C15 C11 0.7(4) . . . . ? 
V1 C14 C15 C11 -61.6(2) . . . . ? 
C13 C14 C15 V1 62.4(3) . . . . ? 
C12 C11 C15 C14 -0.8(4) . . . . ? 
B1 C11 C15 C14 161.3(3) . . . . ? 
V1 C11 C15 C14 62.9(2) . . . . ? 
C12 C11 C15 V1 -63.7(2) . . . . ? 
B1 C11 C15 V1 98.5(3) . . . . ? 
C27 V1 C15 C14 154.3(2) . . . . ? 
C21 V1 C15 C14 -168.2(2) . . . . ? 
C22 V1 C15 C14 -134.4(2) . . . . ? 
C26 V1 C15 C14 115.7(2) . . . . ? 
C25 V1 C15 C14 80.1(2) . . . . ? 
C23 V1 C15 C14 -53.2(6) . . . . ? 
C24 V1 C15 C14 42.4(4) . . . . ? 
C12 V1 C15 C14 -79.0(2) . . . . ? 
C11 V1 C15 C14 -118.2(3) . . . . ? 
C13 V1 C15 C14 -37.1(2) . . . . ? 
C27 V1 C15 C11 -87.5(2) . . . . ? 
C21 V1 C15 C11 -50.0(2) . . . . ? 
C22 V1 C15 C11 -16.2(3) . . . . ? 
C26 V1 C15 C11 -126.1(2) . . . . ? 
C25 V1 C15 C11 -161.70(19) . . . . ? 
C23 V1 C15 C11 65.0(6) . . . . ? 
C24 V1 C15 C11 160.6(2) . . . . ? 
C12 V1 C15 C11 39.2(2) . . . . ? 
C13 V1 C15 C11 81.1(2) . . . . ? 
C14 V1 C15 C11 118.2(3) . . . . ? 
 
_diffrn_measured_fraction_theta_max    0.999 
_diffrn_reflns_theta_full              26.07 
_diffrn_measured_fraction_theta_full   0.999 
_refine_diff_density_max    0.521 
_refine_diff_density_min   -0.370 
_refine_diff_density_rms    0.074 

#===end

data_KR071 


 
_audit_creation_method            SHELXL-97 
_chemical_name_systematic 
; 
?
; 
_chemical_name_common             
;
?
; 
_chemical_melting_point           ? 
_chemical_formula_moiety          
'C28 H52 B2 N2 P2 Pt V'
 
_chemical_formula_sum 
 'C28 H52 B2 N2 P2 Pt V' 
_chemical_formula_weight          746.31 
 
loop_ 
 _atom_type_symbol 
 _atom_type_description 
 _atom_type_scat_dispersion_real 
 _atom_type_scat_dispersion_imag 
 _atom_type_scat_source 
 'C'  'C'   0.0033   0.0016 
 'International Tables Vol C Tables 4.2.6.8 and 6.1.1.4' 
 'H'  'H'   0.0000   0.0000 
 'International Tables Vol C Tables 4.2.6.8 and 6.1.1.4' 
 'B'  'B'   0.0013   0.0007 
 'International Tables Vol C Tables 4.2.6.8 and 6.1.1.4' 
 'N'  'N'   0.0061   0.0033 
 'International Tables Vol C Tables 4.2.6.8 and 6.1.1.4' 
 'P'  'P'   0.1023   0.0942 
 'International Tables Vol C Tables 4.2.6.8 and 6.1.1.4' 
 'V'  'V'   0.3005   0.5294 
 'International Tables Vol C Tables 4.2.6.8 and 6.1.1.4' 
 'Pt'  'Pt'  -1.7033   8.3905 
 'International Tables Vol C Tables 4.2.6.8 and 6.1.1.4' 
 
_symmetry_cell_setting            'Monoclinic' 
_symmetry_space_group_name_H-M    'P2(1)/n'
_symmetry_space_group_name_Hall   ' ' 
 
loop_ 
 _symmetry_equiv_pos_as_xyz 
 'x, y, z' 
 '-x+1/2, y+1/2, -z+1/2' 
 '-x, -y, -z' 
 'x-1/2, -y-1/2, z-1/2' 
 
_cell_length_a                    8.56510(10) 
_cell_length_b                    17.6564(3) 
_cell_length_c                    21.2350(4) 
_cell_angle_alpha                 90.00 
_cell_angle_beta                  91.2400(10) 
_cell_angle_gamma                 90.00 
_cell_volume                      3210.59(9) 
_cell_formula_units_Z             4 
_cell_measurement_temperature     103(2) 
_cell_measurement_reflns_used     9382 
_cell_measurement_theta_min       2.50 
_cell_measurement_theta_max       26.47 
 
_exptl_crystal_description        'plate' 
_exptl_crystal_colour             'red' 
_exptl_crystal_size_max           0.20 
_exptl_crystal_size_mid           0.19 
_exptl_crystal_size_min           0.06 
_exptl_crystal_density_meas       ? 
_exptl_crystal_density_diffrn     1.544 
_exptl_crystal_density_method     'not measured' 
_exptl_crystal_F_000              1500 
_exptl_absorpt_coefficient_mu     4.763 
_exptl_absorpt_correction_type    'multi-scan' 
_exptl_absorpt_correction_T_min   0.4172 
_exptl_absorpt_correction_T_max   0.7530 
_exptl_absorpt_process_details    'Sadabs 2004/1 (Brucker Nonius 2004)' 
 
_exptl_special_details 
; 
 ? 
; 
 
_diffrn_ambient_temperature       103(2) 
_diffrn_radiation_wavelength      0.71073 
_diffrn_radiation_type            MoK\a 
_diffrn_radiation_source          'rotating anode' 
_diffrn_radiation_monochromator   'multi-layer mirror' 
_diffrn_measurement_device_type   'CCD area detector' 
_diffrn_measurement_method        'phi and omega scans' 
_diffrn_detector_area_resol_mean  ? 
_diffrn_standards_number          ? 
_diffrn_standards_interval_count  ? 
_diffrn_standards_interval_time   ? 
_diffrn_standards_decay_%         ? 
_diffrn_reflns_number             76056 
_diffrn_reflns_av_R_equivalents   0.0840 
_diffrn_reflns_av_sigmaI/netI     0.0259 
_diffrn_reflns_limit_h_min        -10 
_diffrn_reflns_limit_h_max        10 
_diffrn_reflns_limit_k_min        -22 
_diffrn_reflns_limit_k_max        22 
_diffrn_reflns_limit_l_min        -26 
_diffrn_reflns_limit_l_max        26 
_diffrn_reflns_theta_min          1.50 
_diffrn_reflns_theta_max          26.47 
_reflns_number_total              6634 
_reflns_number_gt                 6440 
_reflns_threshold_expression      >2sigma(I) 
 
_computing_data_collection        'APEX2 ver. 1.0-27 (Bruker AXS)' 
_computing_cell_refinement        'Saint+ ver. 7.12A (Bruker AXS)' 
_computing_data_reduction         'Saint+ ver. 7.12A (Bruker AXS)' 
_computing_structure_solution     'SHELXS-97 (Sheldrick, 1990)' 
_computing_structure_refinement   'SHELXL-97 (Sheldrick, 1997)' 
_computing_molecular_graphics     'XP ver. 5.1 (Bruker AXS, 1998)' 
_computing_publication_material   'SHELXL-97 (Sheldrick, 1997)' 
 
_refine_special_details 
; 
 Refinement of F^2^ against ALL reflections.  The weighted R-factor wR and 
 goodness of fit S are based on F^2^, conventional R-factors R are based 
 on F, with F set to zero for negative F^2^. The threshold expression of 
 F^2^ > 2sigma(F^2^) is used only for calculating R-factors(gt) etc. and is 
 not relevant to the choice of reflections for refinement.  R-factors based 
 on F^2^ are statistically about twice as large as those based on F, and R- 
 factors based on ALL data will be even larger. 
; 
 
_refine_ls_structure_factor_coef  Fsqd  
_refine_ls_matrix_type            full 
_refine_ls_weighting_scheme       calc  
_refine_ls_weighting_details 
 'calc w=1/[\s^2^(Fo^2^)+(0.0135P)^2^+3.8341P] where P=(Fo^2^+2Fc^2^)/3' 
_atom_sites_solution_primary      direct 
_atom_sites_solution_secondary    difmap 
_atom_sites_solution_hydrogens    geom 
_refine_ls_hydrogen_treatment     constr 
_refine_ls_extinction_method      none 
_refine_ls_extinction_coef        ? 
_refine_ls_number_reflns          6634 
_refine_ls_number_parameters      335 
_refine_ls_number_restraints      0 
_refine_ls_R_factor_all           0.0205 
_refine_ls_R_factor_gt            0.0197 
_refine_ls_wR_factor_ref          0.0505 
_refine_ls_wR_factor_gt           0.0501 
_refine_ls_goodness_of_fit_ref    1.128 
_refine_ls_restrained_S_all       1.128 
_refine_ls_shift/su_max           0.002 
_refine_ls_shift/su_mean          0.000 
 
loop_ 
 _atom_site_label 
 _atom_site_type_symbol 
 _atom_site_fract_x 
 _atom_site_fract_y 
 _atom_site_fract_z 
 _atom_site_U_iso_or_equiv 
 _atom_site_adp_type 
 _atom_site_occupancy 
 _atom_site_symmetry_multiplicity 
 _atom_site_calc_flag 
 _atom_site_refinement_flags 
 _atom_site_disorder_assembly 
 _atom_site_disorder_group 
Pt1 Pt 0.381611(10) 0.302092(5) 0.161504(4) 0.01796(4) Uani 1 1 d . . . 
V1 V 0.24631(6) 0.11322(2) 0.05564(2) 0.03062(11) Uani 1 1 d . . . 
B1 B 0.4089(4) 0.28917(17) 0.06402(14) 0.0249(6) Uani 1 1 d . . . 
C1 C 0.4774(5) 0.20442(15) 0.30309(14) 0.0387(7) Uani 1 1 d . . . 
H1A H 0.4103 0.1627 0.2872 0.046 Uiso 1 1 calc R . . 
H1B H 0.5819 0.1972 0.2850 0.046 Uiso 1 1 calc R . . 
C2 C 0.2179(4) 0.30449(15) 0.31724(13) 0.0314(6) Uani 1 1 d . . . 
H2A H 0.2453 0.3016 0.3627 0.038 Uiso 1 1 calc R . . 
H2B H 0.1732 0.3553 0.3089 0.038 Uiso 1 1 calc R . . 
C3 C 0.5201(3) 0.36477(16) 0.31231(13) 0.0323(6) Uani 1 1 d . . . 
H3A H 0.4772 0.4157 0.3029 0.039 Uiso 1 1 calc R . . 
H3B H 0.5136 0.3567 0.3583 0.039 Uiso 1 1 calc R . . 
C4 C 0.1482(3) 0.05220(16) 0.13859(14) 0.0345(6) Uani 1 1 d . . . 
H4 H 0.0414 0.0382 0.1408 0.041 Uiso 1 1 calc R . . 
C5 C 0.1486(4) 0.22268(16) 0.03258(13) 0.0351(7) Uani 1 1 d . . . 
H5 H 0.1042 0.2635 0.0552 0.042 Uiso 1 1 calc R . . 
C6 C 0.0416(5) 0.16610(19) 0.01172(15) 0.0500(9) Uani 1 1 d . . . 
H6 H -0.0650 0.1760 0.0202 0.060 Uiso 1 1 calc R . . 
C7 C 0.2698(4) 0.00760(16) 0.11408(17) 0.0442(8) Uani 1 1 d . . . 
H7 H 0.2596 -0.0419 0.0970 0.053 Uiso 1 1 calc R . . 
C8 C 0.3628(7) 0.1018(2) -0.03431(19) 0.0819(17) Uani 1 1 d . . . 
H8 H 0.4463 0.0732 -0.0509 0.098 Uiso 1 1 calc R . . 
C9 C 0.0705(6) 0.0973(2) -0.01974(17) 0.0670(14) Uani 1 1 d . . . 
H9 H -0.0184 0.0666 -0.0285 0.080 Uiso 1 1 calc R . . 
C10 C 0.2141(7) 0.0684(2) -0.03982(18) 0.0792(16) Uani 1 1 d . . . 
H10 H 0.2102 0.0202 -0.0596 0.095 Uiso 1 1 calc R . . 
C11 C 0.3112(4) 0.22694(16) 0.02446(12) 0.0323(6) Uani 1 1 d . . . 
P2 P 0.39691(8) 0.29388(4) 0.27193(3) 0.02310(14) Uani 1 1 d . . . 
B2 B 0.4889(4) 0.19504(16) 0.15478(14) 0.0264(6) Uani 1 1 d . . . 
P1 P 0.23939(7) 0.41484(3) 0.15156(3) 0.02038(12) Uani 1 1 d . . . 
N1 N 0.5130(3) 0.33444(14) 0.02870(11) 0.0335(5) Uani 1 1 d . . . 
C12 C 0.3788(3) 0.12260(15) 0.14749(13) 0.0282(5) Uani 1 1 d . . . 
C13 C 0.2150(3) 0.12135(15) 0.15910(12) 0.0279(5) Uani 1 1 d . . . 
H13 H 0.1588 0.1615 0.1780 0.033 Uiso 1 1 calc R . . 
C14 C 0.0307(3) 0.40382(16) 0.16892(14) 0.0309(6) Uani 1 1 d . . . 
H14A H -0.0145 0.3666 0.1388 0.037 Uiso 1 1 calc R . . 
H14B H 0.0231 0.3817 0.2116 0.037 Uiso 1 1 calc R . . 
C15 C 0.2321(3) 0.46510(15) 0.07515(12) 0.0294(6) Uani 1 1 d . . . 
H15A H 0.1835 0.5153 0.0817 0.035 Uiso 1 1 calc R . . 
H15B H 0.3406 0.4740 0.0618 0.035 Uiso 1 1 calc R . . 
C16 C 0.4942(5) 0.19574(18) 0.37452(16) 0.0520(10) Uani 1 1 d . . . 
H16A H 0.5602 0.2365 0.3915 0.078 Uiso 1 1 calc R . . 
H16B H 0.5422 0.1467 0.3845 0.078 Uiso 1 1 calc R . . 
H16C H 0.3908 0.1984 0.3933 0.078 Uiso 1 1 calc R . . 
C17 C 0.1437(4) 0.42532(17) 0.02169(13) 0.0377(7) Uani 1 1 d . . . 
H17A H 0.1907 0.3756 0.0143 0.057 Uiso 1 1 calc R . . 
H17B H 0.1492 0.4560 -0.0167 0.057 Uiso 1 1 calc R . . 
H17C H 0.0342 0.4188 0.0331 0.057 Uiso 1 1 calc R . . 
C18 C 0.0945(4) 0.2451(2) 0.30189(15) 0.0421(7) Uani 1 1 d . . . 
H18A H 0.0658 0.2478 0.2570 0.063 Uiso 1 1 calc R . . 
H18B H 0.0019 0.2545 0.3271 0.063 Uiso 1 1 calc R . . 
H18C H 0.1361 0.1947 0.3117 0.063 Uiso 1 1 calc R . . 
C19 C 0.6198(4) 0.38957(19) 0.05708(16) 0.0428(7) Uani 1 1 d . . . 
H19A H 0.5994 0.3939 0.1022 0.064 Uiso 1 1 calc R . . 
H19B H 0.6040 0.4389 0.0368 0.064 Uiso 1 1 calc R . . 
H19C H 0.7277 0.3729 0.0513 0.064 Uiso 1 1 calc R . . 
C20 C 0.4101(4) 0.05024(17) 0.11960(18) 0.0445(8) Uani 1 1 d . . . 
H20 H 0.5098 0.0334 0.1068 0.053 Uiso 1 1 calc R . . 
C21 C 0.6910(4) 0.3637(2) 0.29465(18) 0.0516(9) Uani 1 1 d . . . 
H21A H 0.7374 0.3150 0.3069 0.077 Uiso 1 1 calc R . . 
H21B H 0.7465 0.4047 0.3166 0.077 Uiso 1 1 calc R . . 
H21C H 0.6993 0.3706 0.2491 0.077 Uiso 1 1 calc R . . 
C22 C 0.5231(5) 0.3353(2) -0.03981(15) 0.0599(11) Uani 1 1 d . . . 
H22A H 0.4422 0.3022 -0.0581 0.090 Uiso 1 1 calc R . . 
H22B H 0.6262 0.3172 -0.0520 0.090 Uiso 1 1 calc R . . 
H22C H 0.5075 0.3871 -0.0553 0.090 Uiso 1 1 calc R . . 
N2 N 0.6528(3) 0.18255(14) 0.15943(13) 0.0357(6) Uani 1 1 d . . . 
C23 C 0.2967(3) 0.49476(14) 0.20284(13) 0.0282(5) Uani 1 1 d . . . 
H23A H 0.2292 0.5388 0.1927 0.034 Uiso 1 1 calc R . . 
H23B H 0.2793 0.4806 0.2473 0.034 Uiso 1 1 calc R . . 
C24 C 0.4668(4) 0.51754(17) 0.19568(14) 0.0365(6) Uani 1 1 d . . . 
H24A H 0.5335 0.4727 0.2006 0.055 Uiso 1 1 calc R . . 
H24B H 0.4954 0.5550 0.2280 0.055 Uiso 1 1 calc R . . 
H24C H 0.4810 0.5396 0.1538 0.055 Uiso 1 1 calc R . . 
C25 C -0.0711(4) 0.47498(19) 0.16636(17) 0.0439(8) Uani 1 1 d . . . 
H25A H -0.0367 0.5102 0.1995 0.066 Uiso 1 1 calc R . . 
H25B H -0.1803 0.4610 0.1728 0.066 Uiso 1 1 calc R . . 
H25C H -0.0615 0.4993 0.1252 0.066 Uiso 1 1 calc R . . 
C26 C 0.7654(4) 0.2439(2) 0.15725(19) 0.0502(9) Uani 1 1 d . . . 
H26A H 0.7105 0.2919 0.1501 0.075 Uiso 1 1 calc R . . 
H26B H 0.8376 0.2350 0.1228 0.075 Uiso 1 1 calc R . . 
H26C H 0.8243 0.2463 0.1973 0.075 Uiso 1 1 calc R . . 
C27 C 0.7302(4) 0.1103(2) 0.1711(2) 0.0602(11) Uani 1 1 d . . . 
H27A H 0.7799 0.0932 0.1325 0.090 Uiso 1 1 calc R . . 
H27B H 0.6530 0.0728 0.1840 0.090 Uiso 1 1 calc R . . 
H27C H 0.8097 0.1165 0.2046 0.090 Uiso 1 1 calc R . . 
C28 C 0.4043(5) 0.1724(2) -0.00727(16) 0.0572(11) Uani 1 1 d . . . 
H28 H 0.5113 0.1856 -0.0108 0.069 Uiso 1 1 calc R . . 
 
loop_ 
 _atom_site_aniso_label 
 _atom_site_aniso_U_11 
 _atom_site_aniso_U_22 
 _atom_site_aniso_U_33 
 _atom_site_aniso_U_23 
 _atom_site_aniso_U_13 
 _atom_site_aniso_U_12 
Pt1 0.02269(6) 0.01539(6) 0.01575(6) -0.00125(3) -0.00086(4) -0.00084(3) 
V1 0.0493(3) 0.0191(2) 0.0237(2) -0.00528(17) 0.0054(2) -0.00824(19) 
B1 0.0327(15) 0.0211(13) 0.0210(14) -0.0022(11) 0.0049(12) -0.0029(11) 
C1 0.067(2) 0.0240(14) 0.0251(15) 0.0004(11) -0.0101(14) 0.0109(13) 
C2 0.0401(16) 0.0343(15) 0.0200(13) -0.0001(10) 0.0029(12) 0.0044(11) 
C3 0.0424(15) 0.0295(14) 0.0246(13) -0.0059(11) -0.0082(12) -0.0018(12) 
C4 0.0366(15) 0.0330(15) 0.0338(15) 0.0143(12) -0.0016(12) -0.0033(12) 
C5 0.0517(17) 0.0247(13) 0.0283(14) 0.0080(12) -0.0154(13) -0.0101(13) 
C6 0.069(2) 0.0408(18) 0.0390(17) 0.0161(15) -0.0285(17) -0.0247(17) 
C7 0.0534(19) 0.0184(13) 0.060(2) 0.0038(14) -0.0043(16) -0.0002(13) 
C8 0.147(5) 0.049(2) 0.051(2) -0.0278(19) 0.057(3) -0.040(3) 
C9 0.118(4) 0.052(2) 0.0301(17) 0.0089(16) -0.025(2) -0.048(2) 
C10 0.155(5) 0.050(2) 0.0334(19) -0.0189(17) 0.023(2) -0.046(3) 
C11 0.0556(18) 0.0248(13) 0.0165(12) -0.0016(11) 0.0018(12) -0.0081(13) 
P2 0.0329(3) 0.0192(3) 0.0170(3) -0.0011(2) -0.0037(3) 0.0021(2) 
B2 0.0339(16) 0.0249(15) 0.0203(14) -0.0027(11) 0.0005(12) 0.0023(11) 
P1 0.0253(3) 0.0158(3) 0.0200(3) 0.0005(2) -0.0023(2) -0.0015(2) 
N1 0.0446(14) 0.0309(12) 0.0254(11) -0.0019(10) 0.0115(10) -0.0121(11) 
C12 0.0358(14) 0.0178(12) 0.0310(13) 0.0012(11) -0.0022(11) 0.0049(10) 
C13 0.0380(14) 0.0252(13) 0.0207(12) 0.0049(10) 0.0024(11) 0.0024(11) 
C14 0.0271(13) 0.0270(13) 0.0384(15) 0.0064(12) -0.0010(11) -0.0016(11) 
C15 0.0410(15) 0.0209(12) 0.0262(13) 0.0053(11) -0.0031(11) -0.0012(11) 
C16 0.089(3) 0.0399(19) 0.0265(16) 0.0052(13) -0.0114(17) 0.0188(17) 
C17 0.0546(18) 0.0298(14) 0.0283(14) 0.0060(12) -0.0119(13) 0.0014(13) 
C18 0.0419(17) 0.0489(19) 0.0357(16) 0.0041(14) 0.0043(13) -0.0059(14) 
C19 0.0405(16) 0.0446(18) 0.0436(18) 0.0008(14) 0.0101(14) -0.0172(14) 
C20 0.0397(16) 0.0233(14) 0.070(2) -0.0114(15) -0.0013(16) 0.0081(12) 
C21 0.0433(18) 0.055(2) 0.056(2) -0.0117(17) -0.0100(16) -0.0082(16) 
C22 0.091(3) 0.060(2) 0.0291(16) -0.0025(16) 0.0241(17) -0.033(2) 
N2 0.0314(12) 0.0320(12) 0.0436(14) -0.0086(11) -0.0030(11) 0.0100(10) 
C23 0.0356(14) 0.0200(12) 0.0286(13) -0.0060(10) -0.0054(11) 0.0020(10) 
C24 0.0425(16) 0.0320(15) 0.0346(15) -0.0037(12) -0.0068(13) -0.0121(12) 
C25 0.0340(15) 0.0405(17) 0.057(2) 0.0068(15) 0.0027(14) 0.0058(13) 
C26 0.0269(15) 0.054(2) 0.070(2) -0.0172(18) 0.0002(15) 0.0040(14) 
C27 0.0467(19) 0.045(2) 0.089(3) -0.015(2) -0.018(2) 0.0234(16) 
C28 0.096(3) 0.0360(17) 0.0411(18) -0.0107(15) 0.0418(19) -0.0193(19) 
 
_geom_special_details 
; 
 All esds (except the esd in the dihedral angle between two l.s. planes) 
 are estimated using the full covariance matrix.  The cell esds are taken 
 into account individually in the estimation of esds in distances, angles 
 and torsion angles; correlations between esds in cell parameters are only 
 used when they are defined by crystal symmetry.  An approximate (isotropic) 
 treatment of cell esds is used for estimating esds involving l.s. planes. 
; 
 
loop_ 
 _geom_bond_atom_site_label_1 
 _geom_bond_atom_site_label_2 
 _geom_bond_distance 
 _geom_bond_site_symmetry_2 
 _geom_bond_publ_flag 
Pt1 B1 2.101(3) . ? 
Pt1 B2 2.108(3) . ? 
Pt1 P1 2.3411(6) . ? 
Pt1 P2 2.3502(7) . ? 
V1 C5 2.158(3) . ? 
V1 C6 2.179(4) . ? 
V1 C8 2.183(4) . ? 
V1 C28 2.187(3) . ? 
V1 C10 2.188(4) . ? 
V1 C11 2.190(3) . ? 
V1 C9 2.192(4) . ? 
V1 C13 2.224(3) . ? 
V1 C20 2.228(3) . ? 
V1 C12 2.241(3) . ? 
V1 C4 2.243(3) . ? 
V1 C7 2.247(3) . ? 
B1 N1 1.423(4) . ? 
B1 C11 1.607(4) . ? 
C1 C16 1.528(4) . ? 
C1 P2 1.841(3) . ? 
C1 H1A 0.9900 . ? 
C1 H1B 0.9900 . ? 
C2 C18 1.520(4) . ? 
C2 P2 1.837(3) . ? 
C2 H2A 0.9900 . ? 
C2 H2B 0.9900 . ? 
C3 C21 1.518(5) . ? 
C3 P2 1.838(3) . ? 
C3 H3A 0.9900 . ? 
C3 H3B 0.9900 . ? 
C4 C13 1.413(4) . ? 
C4 C7 1.414(5) . ? 
C4 H4 0.9500 . ? 
C5 C11 1.409(4) . ? 
C5 C6 1.420(4) . ? 
C5 H5 0.9500 . ? 
C6 C9 1.411(6) . ? 
C6 H6 0.9500 . ? 
C7 C20 1.420(4) . ? 
C7 H7 0.9500 . ? 
C8 C10 1.406(7) . ? 
C8 C28 1.414(5) . ? 
C8 H8 0.9500 . ? 
C9 C10 1.406(7) . ? 
C9 H9 0.9500 . ? 
C10 H10 0.9500 . ? 
C11 C28 1.429(5) . ? 
B2 N2 1.423(4) . ? 
B2 C12 1.594(4) . ? 
P1 C23 1.843(3) . ? 
P1 C14 1.843(3) . ? 
P1 C15 1.849(3) . ? 
N1 C19 1.457(4) . ? 
N1 C22 1.459(4) . ? 
C12 C13 1.430(4) . ? 
C12 C20 1.436(4) . ? 
C13 H13 0.9500 . ? 
C14 C25 1.530(4) . ? 
C14 H14A 0.9900 . ? 
C14 H14B 0.9900 . ? 
C15 C17 1.523(4) . ? 
C15 H15A 0.9900 . ? 
C15 H15B 0.9900 . ? 
C16 H16A 0.9800 . ? 
C16 H16B 0.9800 . ? 
C16 H16C 0.9800 . ? 
C17 H17A 0.9800 . ? 
C17 H17B 0.9800 . ? 
C17 H17C 0.9800 . ? 
C18 H18A 0.9800 . ? 
C18 H18B 0.9800 . ? 
C18 H18C 0.9800 . ? 
C19 H19A 0.9800 . ? 
C19 H19B 0.9800 . ? 
C19 H19C 0.9800 . ? 
C20 H20 0.9500 . ? 
C21 H21A 0.9800 . ? 
C21 H21B 0.9800 . ? 
C21 H21C 0.9800 . ? 
C22 H22A 0.9800 . ? 
C22 H22B 0.9800 . ? 
C22 H22C 0.9800 . ? 
N2 C26 1.452(4) . ? 
N2 C27 1.456(4) . ? 
C23 C24 1.522(4) . ? 
C23 H23A 0.9900 . ? 
C23 H23B 0.9900 . ? 
C24 H24A 0.9800 . ? 
C24 H24B 0.9800 . ? 
C24 H24C 0.9800 . ? 
C25 H25A 0.9800 . ? 
C25 H25B 0.9800 . ? 
C25 H25C 0.9800 . ? 
C26 H26A 0.9800 . ? 
C26 H26B 0.9800 . ? 
C26 H26C 0.9800 . ? 
C27 H27A 0.9800 . ? 
C27 H27B 0.9800 . ? 
C27 H27C 0.9800 . ? 
C28 H28 0.9500 . ? 
 
loop_ 
 _geom_angle_atom_site_label_1 
 _geom_angle_atom_site_label_2 
 _geom_angle_atom_site_label_3 
 _geom_angle 
 _geom_angle_site_symmetry_1 
 _geom_angle_site_symmetry_3 
 _geom_angle_publ_flag 
B1 Pt1 B2 77.17(12) . . ? 
B1 Pt1 P1 94.14(8) . . ? 
B2 Pt1 P1 169.47(8) . . ? 
B1 Pt1 P2 166.29(9) . . ? 
B2 Pt1 P2 89.85(8) . . ? 
P1 Pt1 P2 99.22(2) . . ? 
C5 V1 C6 38.22(11) . . ? 
C5 V1 C8 93.80(16) . . ? 
C6 V1 C8 92.51(19) . . ? 
C5 V1 C28 71.09(14) . . ? 
C6 V1 C28 92.11(16) . . ? 
C8 V1 C28 37.74(13) . . ? 
C5 V1 C10 94.18(16) . . ? 
C6 V1 C10 70.98(19) . . ? 
C8 V1 C10 37.52(18) . . ? 
C28 V1 C10 70.97(15) . . ? 
C5 V1 C11 37.81(12) . . ? 
C6 V1 C11 71.62(12) . . ? 
C8 V1 C11 72.31(13) . . ? 
C28 V1 C11 38.11(12) . . ? 
C10 V1 C11 94.53(13) . . ? 
C5 V1 C9 72.06(14) . . ? 
C6 V1 C9 37.66(16) . . ? 
C8 V1 C9 70.7(2) . . ? 
C28 V1 C9 92.26(16) . . ? 
C10 V1 C9 37.46(19) . . ? 
C11 V1 C9 94.10(12) . . ? 
C5 V1 C13 96.43(11) . . ? 
C6 V1 C13 106.38(13) . . ? 
C8 V1 C13 159.64(18) . . ? 
C28 V1 C13 131.46(12) . . ? 
C10 V1 C13 157.41(13) . . ? 
C11 V1 C13 106.05(10) . . ? 
C9 V1 C13 129.36(15) . . ? 
C5 V1 C20 145.19(11) . . ? 
C6 V1 C20 164.79(14) . . ? 
C8 V1 C20 101.18(19) . . ? 
C28 V1 C20 102.77(16) . . ? 
C10 V1 C20 116.71(18) . . ? 
C11 V1 C20 118.78(12) . . ? 
C9 V1 C20 142.61(14) . . ? 
C13 V1 C20 61.17(11) . . ? 
C5 V1 C12 108.53(10) . . ? 
C6 V1 C12 136.76(12) . . ? 
C8 V1 C12 122.40(17) . . ? 
C28 V1 C12 100.83(14) . . ? 
C10 V1 C12 152.17(18) . . ? 
C11 V1 C12 93.92(10) . . ? 
C9 V1 C12 166.38(15) . . ? 
C13 V1 C12 37.35(10) . . ? 
C20 V1 C12 37.47(10) . . ? 
C5 V1 C4 117.27(12) . . ? 
C6 V1 C4 103.32(13) . . ? 
C8 V1 C4 145.96(14) . . ? 
C28 V1 C4 162.92(14) . . ? 
C10 V1 C4 120.80(13) . . ? 
C11 V1 C4 141.22(11) . . ? 
C9 V1 C4 104.41(13) . . ? 
C13 V1 C4 36.88(10) . . ? 
C20 V1 C4 61.52(12) . . ? 
C12 V1 C4 62.83(10) . . ? 
C5 V1 C7 153.94(13) . . ? 
C6 V1 C7 130.84(12) . . ? 
C8 V1 C7 111.69(16) . . ? 
C28 V1 C7 133.19(15) . . ? 
C10 V1 C7 102.70(15) . . ? 
C11 V1 C7 155.21(12) . . ? 
C9 V1 C7 110.43(13) . . ? 
C13 V1 C7 61.26(11) . . ? 
C20 V1 C7 37.00(12) . . ? 
C12 V1 C7 62.81(11) . . ? 
C4 V1 C7 36.70(12) . . ? 
N1 B1 C11 115.7(2) . . ? 
N1 B1 Pt1 122.9(2) . . ? 
C11 B1 Pt1 121.44(19) . . ? 
C16 C1 P2 118.0(2) . . ? 
C16 C1 H1A 107.8 . . ? 
P2 C1 H1A 107.8 . . ? 
C16 C1 H1B 107.8 . . ? 
P2 C1 H1B 107.8 . . ? 
H1A C1 H1B 107.1 . . ? 
C18 C2 P2 113.7(2) . . ? 
C18 C2 H2A 108.8 . . ? 
P2 C2 H2A 108.8 . . ? 
C18 C2 H2B 108.8 . . ? 
P2 C2 H2B 108.8 . . ? 
H2A C2 H2B 107.7 . . ? 
C21 C3 P2 115.0(2) . . ? 
C21 C3 H3A 108.5 . . ? 
P2 C3 H3A 108.5 . . ? 
C21 C3 H3B 108.5 . . ? 
P2 C3 H3B 108.5 . . ? 
H3A C3 H3B 107.5 . . ? 
C13 C4 C7 107.4(3) . . ? 
C13 C4 V1 70.80(15) . . ? 
C7 C4 V1 71.78(18) . . ? 
C13 C4 H4 126.3 . . ? 
C7 C4 H4 126.3 . . ? 
V1 C4 H4 122.8 . . ? 
C11 C5 C6 129.2(3) . . ? 
C11 C5 V1 72.31(17) . . ? 
C6 C5 V1 71.66(19) . . ? 
C11 C5 H5 115.4 . . ? 
C6 C5 H5 115.4 . . ? 
V1 C5 H5 136.2 . . ? 
C9 C6 C5 129.4(4) . . ? 
C9 C6 V1 71.7(2) . . ? 
C5 C6 V1 70.11(18) . . ? 
C9 C6 H6 115.3 . . ? 
C5 C6 H6 115.3 . . ? 
V1 C6 H6 139.9 . . ? 
C4 C7 C20 107.6(3) . . ? 
C4 C7 V1 71.52(16) . . ? 
C20 C7 V1 70.80(18) . . ? 
C4 C7 H7 126.2 . . ? 
C20 C7 H7 126.2 . . ? 
V1 C7 H7 123.2 . . ? 
C10 C8 C28 128.5(5) . . ? 
C10 C8 V1 71.4(2) . . ? 
C28 C8 V1 71.3(2) . . ? 
C10 C8 H8 115.7 . . ? 
C28 C8 H8 115.7 . . ? 
V1 C8 H8 137.4 . . ? 
C10 C9 C6 128.3(4) . . ? 
C10 C9 V1 71.1(2) . . ? 
C6 C9 V1 70.66(18) . . ? 
C10 C9 H9 115.9 . . ? 
C6 C9 H9 115.9 . . ? 
V1 C9 H9 138.7 . . ? 
C8 C10 C9 128.3(4) . . ? 
C8 C10 V1 71.1(2) . . ? 
C9 C10 V1 71.4(2) . . ? 
C8 C10 H10 115.9 . . ? 
C9 C10 H10 115.9 . . ? 
V1 C10 H10 137.5 . . ? 
C5 C11 C28 125.8(3) . . ? 
C5 C11 B1 118.5(3) . . ? 
C28 C11 B1 114.7(3) . . ? 
C5 C11 V1 69.88(16) . . ? 
C28 C11 V1 70.85(18) . . ? 
B1 C11 V1 126.98(18) . . ? 
C2 P2 C3 99.42(13) . . ? 
C2 P2 C1 102.10(15) . . ? 
C3 P2 C1 102.12(14) . . ? 
C2 P2 Pt1 119.15(10) . . ? 
C3 P2 Pt1 116.27(10) . . ? 
C1 P2 Pt1 115.08(10) . . ? 
N2 B2 C12 117.6(2) . . ? 
N2 B2 Pt1 124.4(2) . . ? 
C12 B2 Pt1 117.9(2) . . ? 
C23 P1 C14 102.11(13) . . ? 
C23 P1 C15 98.90(12) . . ? 
C14 P1 C15 102.21(13) . . ? 
C23 P1 Pt1 117.80(9) . . ? 
C14 P1 Pt1 113.40(9) . . ? 
C15 P1 Pt1 119.67(9) . . ? 
B1 N1 C19 123.5(2) . . ? 
B1 N1 C22 125.6(3) . . ? 
C19 N1 C22 110.8(2) . . ? 
C13 C12 C20 104.5(2) . . ? 
C13 C12 B2 125.2(2) . . ? 
C20 C12 B2 129.7(3) . . ? 
C13 C12 V1 70.65(15) . . ? 
C20 C12 V1 70.78(18) . . ? 
B2 C12 V1 115.53(18) . . ? 
C4 C13 C12 110.6(2) . . ? 
C4 C13 V1 72.32(16) . . ? 
C12 C13 V1 71.99(16) . . ? 
C4 C13 H13 124.7 . . ? 
C12 C13 H13 124.7 . . ? 
V1 C13 H13 122.6 . . ? 
C25 C14 P1 117.4(2) . . ? 
C25 C14 H14A 107.9 . . ? 
P1 C14 H14A 107.9 . . ? 
C25 C14 H14B 107.9 . . ? 
P1 C14 H14B 107.9 . . ? 
H14A C14 H14B 107.2 . . ? 
C17 C15 P1 116.08(19) . . ? 
C17 C15 H15A 108.3 . . ? 
P1 C15 H15A 108.3 . . ? 
C17 C15 H15B 108.3 . . ? 
P1 C15 H15B 108.3 . . ? 
H15A C15 H15B 107.4 . . ? 
C1 C16 H16A 109.5 . . ? 
C1 C16 H16B 109.5 . . ? 
H16A C16 H16B 109.5 . . ? 
C1 C16 H16C 109.5 . . ? 
H16A C16 H16C 109.5 . . ? 
H16B C16 H16C 109.5 . . ? 
C15 C17 H17A 109.5 . . ? 
C15 C17 H17B 109.5 . . ? 
H17A C17 H17B 109.5 . . ? 
C15 C17 H17C 109.5 . . ? 
H17A C17 H17C 109.5 . . ? 
H17B C17 H17C 109.5 . . ? 
C2 C18 H18A 109.5 . . ? 
C2 C18 H18B 109.5 . . ? 
H18A C18 H18B 109.5 . . ? 
C2 C18 H18C 109.5 . . ? 
H18A C18 H18C 109.5 . . ? 
H18B C18 H18C 109.5 . . ? 
N1 C19 H19A 109.5 . . ? 
N1 C19 H19B 109.5 . . ? 
H19A C19 H19B 109.5 . . ? 
N1 C19 H19C 109.5 . . ? 
H19A C19 H19C 109.5 . . ? 
H19B C19 H19C 109.5 . . ? 
C7 C20 C12 109.9(3) . . ? 
C7 C20 V1 72.20(18) . . ? 
C12 C20 V1 71.75(17) . . ? 
C7 C20 H20 125.0 . . ? 
C12 C20 H20 125.0 . . ? 
V1 C20 H20 122.6 . . ? 
C3 C21 H21A 109.5 . . ? 
C3 C21 H21B 109.5 . . ? 
H21A C21 H21B 109.5 . . ? 
C3 C21 H21C 109.5 . . ? 
H21A C21 H21C 109.5 . . ? 
H21B C21 H21C 109.5 . . ? 
N1 C22 H22A 109.5 . . ? 
N1 C22 H22B 109.5 . . ? 
H22A C22 H22B 109.5 . . ? 
N1 C22 H22C 109.5 . . ? 
H22A C22 H22C 109.5 . . ? 
H22B C22 H22C 109.5 . . ? 
B2 N2 C26 122.5(2) . . ? 
B2 N2 C27 126.3(3) . . ? 
C26 N2 C27 111.0(3) . . ? 
C24 C23 P1 112.75(19) . . ? 
C24 C23 H23A 109.0 . . ? 
P1 C23 H23A 109.0 . . ? 
C24 C23 H23B 109.0 . . ? 
P1 C23 H23B 109.0 . . ? 
H23A C23 H23B 107.8 . . ? 
C23 C24 H24A 109.5 . . ? 
C23 C24 H24B 109.5 . . ? 
H24A C24 H24B 109.5 . . ? 
C23 C24 H24C 109.5 . . ? 
H24A C24 H24C 109.5 . . ? 
H24B C24 H24C 109.5 . . ? 
C14 C25 H25A 109.5 . . ? 
C14 C25 H25B 109.5 . . ? 
H25A C25 H25B 109.5 . . ? 
C14 C25 H25C 109.5 . . ? 
H25A C25 H25C 109.5 . . ? 
H25B C25 H25C 109.5 . . ? 
N2 C26 H26A 109.5 . . ? 
N2 C26 H26B 109.5 . . ? 
H26A C26 H26B 109.5 . . ? 
N2 C26 H26C 109.5 . . ? 
H26A C26 H26C 109.5 . . ? 
H26B C26 H26C 109.5 . . ? 
N2 C27 H27A 109.5 . . ? 
N2 C27 H27B 109.5 . . ? 
H27A C27 H27B 109.5 . . ? 
N2 C27 H27C 109.5 . . ? 
H27A C27 H27C 109.5 . . ? 
H27B C27 H27C 109.5 . . ? 
C8 C28 C11 130.4(4) . . ? 
C8 C28 V1 71.0(2) . . ? 
C11 C28 V1 71.04(18) . . ? 
C8 C28 H28 114.8 . . ? 
C11 C28 H28 114.8 . . ? 
V1 C28 H28 140.9 . . ? 
 
loop_ 
 _geom_torsion_atom_site_label_1 
 _geom_torsion_atom_site_label_2 
 _geom_torsion_atom_site_label_3 
 _geom_torsion_atom_site_label_4 
 _geom_torsion 
 _geom_torsion_site_symmetry_1 
 _geom_torsion_site_symmetry_2 
 _geom_torsion_site_symmetry_3 
 _geom_torsion_site_symmetry_4 
 _geom_torsion_publ_flag 
B2 Pt1 B1 N1 -112.2(3) . . . . ? 
P1 Pt1 B1 N1 73.8(2) . . . . ? 
P2 Pt1 B1 N1 -93.2(4) . . . . ? 
B2 Pt1 B1 C11 68.1(2) . . . . ? 
P1 Pt1 B1 C11 -105.9(2) . . . . ? 
P2 Pt1 B1 C11 87.1(4) . . . . ? 
C5 V1 C4 C13 -61.48(19) . . . . ? 
C6 V1 C4 C13 -99.64(18) . . . . ? 
C8 V1 C4 C13 144.8(3) . . . . ? 
C28 V1 C4 C13 54.4(5) . . . . ? 
C10 V1 C4 C13 -175.2(2) . . . . ? 
C11 V1 C4 C13 -22.5(3) . . . . ? 
C9 V1 C4 C13 -138.5(2) . . . . ? 
C20 V1 C4 C13 78.98(18) . . . . ? 
C12 V1 C4 C13 36.41(15) . . . . ? 
C7 V1 C4 C13 116.6(2) . . . . ? 
C5 V1 C4 C7 -178.05(18) . . . . ? 
C6 V1 C4 C7 143.78(19) . . . . ? 
C8 V1 C4 C7 28.3(4) . . . . ? 
C28 V1 C4 C7 -62.2(5) . . . . ? 
C10 V1 C4 C7 68.2(3) . . . . ? 
C11 V1 C4 C7 -139.1(2) . . . . ? 
C9 V1 C4 C7 105.0(2) . . . . ? 
C13 V1 C4 C7 -116.6(2) . . . . ? 
C20 V1 C4 C7 -37.59(18) . . . . ? 
C12 V1 C4 C7 -80.16(19) . . . . ? 
C6 V1 C5 C11 -143.6(3) . . . . ? 
C8 V1 C5 C11 -54.4(2) . . . . ? 
C28 V1 C5 C11 -23.76(17) . . . . ? 
C10 V1 C5 C11 -92.0(2) . . . . ? 
C9 V1 C5 C11 -122.7(2) . . . . ? 
C13 V1 C5 C11 107.97(17) . . . . ? 
C20 V1 C5 C11 61.5(3) . . . . ? 
C12 V1 C5 C11 71.67(18) . . . . ? 
C4 V1 C5 C11 140.02(16) . . . . ? 
C7 V1 C5 C11 137.4(3) . . . . ? 
C8 V1 C5 C6 89.2(2) . . . . ? 
C28 V1 C5 C6 119.9(2) . . . . ? 
C10 V1 C5 C6 51.6(2) . . . . ? 
C11 V1 C5 C6 143.6(3) . . . . ? 
C9 V1 C5 C6 21.0(2) . . . . ? 
C13 V1 C5 C6 -108.4(2) . . . . ? 
C20 V1 C5 C6 -154.9(2) . . . . ? 
C12 V1 C5 C6 -144.7(2) . . . . ? 
C4 V1 C5 C6 -76.4(2) . . . . ? 
C7 V1 C5 C6 -79.0(3) . . . . ? 
C11 C5 C6 C9 3.7(5) . . . . ? 
V1 C5 C6 C9 -43.2(3) . . . . ? 
C11 C5 C6 V1 46.8(3) . . . . ? 
C5 V1 C6 C9 146.2(3) . . . . ? 
C8 V1 C6 C9 53.2(2) . . . . ? 
C28 V1 C6 C9 91.0(2) . . . . ? 
C10 V1 C6 C9 21.9(2) . . . . ? 
C11 V1 C6 C9 123.6(2) . . . . ? 
C13 V1 C6 C9 -134.5(2) . . . . ? 
C20 V1 C6 C9 -101.0(5) . . . . ? 
C12 V1 C6 C9 -160.7(2) . . . . ? 
C4 V1 C6 C9 -96.4(2) . . . . ? 
C7 V1 C6 C9 -68.6(3) . . . . ? 
C8 V1 C6 C5 -93.0(2) . . . . ? 
C28 V1 C6 C5 -55.2(2) . . . . ? 
C10 V1 C6 C5 -124.2(2) . . . . ? 
C11 V1 C6 C5 -22.53(19) . . . . ? 
C9 V1 C6 C5 -146.2(3) . . . . ? 
C13 V1 C6 C5 79.4(2) . . . . ? 
C20 V1 C6 C5 112.8(4) . . . . ? 
C12 V1 C6 C5 53.1(3) . . . . ? 
C4 V1 C6 C5 117.4(2) . . . . ? 
C7 V1 C6 C5 145.2(2) . . . . ? 
C13 C4 C7 C20 -0.3(4) . . . . ? 
V1 C4 C7 C20 62.0(2) . . . . ? 
C13 C4 C7 V1 -62.25(19) . . . . ? 
C5 V1 C7 C4 3.9(4) . . . . ? 
C6 V1 C7 C4 -49.5(3) . . . . ? 
C8 V1 C7 C4 -163.4(2) . . . . ? 
C28 V1 C7 C4 159.13(19) . . . . ? 
C10 V1 C7 C4 -125.2(2) . . . . ? 
C11 V1 C7 C4 101.9(3) . . . . ? 
C9 V1 C7 C4 -86.8(2) . . . . ? 
C13 V1 C7 C4 37.74(17) . . . . ? 
C20 V1 C7 C4 117.0(3) . . . . ? 
C12 V1 C7 C4 80.23(19) . . . . ? 
C5 V1 C7 C20 -113.1(3) . . . . ? 
C6 V1 C7 C20 -166.5(2) . . . . ? 
C8 V1 C7 C20 79.6(2) . . . . ? 
C28 V1 C7 C20 42.1(3) . . . . ? 
C10 V1 C7 C20 117.8(2) . . . . ? 
C11 V1 C7 C20 -15.1(4) . . . . ? 
C9 V1 C7 C20 156.1(2) . . . . ? 
C13 V1 C7 C20 -79.3(2) . . . . ? 
C12 V1 C7 C20 -36.80(19) . . . . ? 
C4 V1 C7 C20 -117.0(3) . . . . ? 
C5 V1 C8 C10 -91.9(3) . . . . ? 
C6 V1 C8 C10 -53.7(3) . . . . ? 
C28 V1 C8 C10 -143.9(5) . . . . ? 
C11 V1 C8 C10 -123.5(3) . . . . ? 
C9 V1 C8 C10 -22.4(3) . . . . ? 
C13 V1 C8 C10 148.0(4) . . . . ? 
C20 V1 C8 C10 119.7(3) . . . . ? 
C12 V1 C8 C10 153.3(3) . . . . ? 
C4 V1 C8 C10 64.8(5) . . . . ? 
C7 V1 C8 C10 82.5(3) . . . . ? 
C5 V1 C8 C28 51.9(3) . . . . ? 
C6 V1 C8 C28 90.2(3) . . . . ? 
C10 V1 C8 C28 143.9(5) . . . . ? 
C11 V1 C8 C28 20.4(3) . . . . ? 
C9 V1 C8 C28 121.4(3) . . . . ? 
C13 V1 C8 C28 -68.1(5) . . . . ? 
C20 V1 C8 C28 -96.5(3) . . . . ? 
C12 V1 C8 C28 -62.9(3) . . . . ? 
C4 V1 C8 C28 -151.3(3) . . . . ? 
C7 V1 C8 C28 -133.6(3) . . . . ? 
C5 C6 C9 C10 -1.8(6) . . . . ? 
V1 C6 C9 C10 -44.4(4) . . . . ? 
C5 C6 C9 V1 42.7(3) . . . . ? 
C5 V1 C9 C10 123.3(2) . . . . ? 
C6 V1 C9 C10 144.5(3) . . . . ? 
C8 V1 C9 C10 22.5(2) . . . . ? 
C28 V1 C9 C10 54.0(2) . . . . ? 
C11 V1 C9 C10 92.1(2) . . . . ? 
C13 V1 C9 C10 -153.2(2) . . . . ? 
C20 V1 C9 C10 -60.6(3) . . . . ? 
C12 V1 C9 C10 -142.0(5) . . . . ? 
C4 V1 C9 C10 -122.3(2) . . . . ? 
C7 V1 C9 C10 -84.2(2) . . . . ? 
C5 V1 C9 C6 -21.2(2) . . . . ? 
C8 V1 C9 C6 -122.0(2) . . . . ? 
C28 V1 C9 C6 -90.5(2) . . . . ? 
C10 V1 C9 C6 -144.5(3) . . . . ? 
C11 V1 C9 C6 -52.4(2) . . . . ? 
C13 V1 C9 C6 62.3(2) . . . . ? 
C20 V1 C9 C6 154.9(2) . . . . ? 
C12 V1 C9 C6 73.5(6) . . . . ? 
C4 V1 C9 C6 93.2(2) . . . . ? 
C7 V1 C9 C6 131.3(2) . . . . ? 
C28 C8 C10 C9 0.1(8) . . . . ? 
V1 C8 C10 C9 45.6(4) . . . . ? 
C28 C8 C10 V1 -45.6(4) . . . . ? 
C6 C9 C10 C8 -1.2(7) . . . . ? 
V1 C9 C10 C8 -45.5(4) . . . . ? 
C6 C9 C10 V1 44.3(4) . . . . ? 
C5 V1 C10 C8 90.8(3) . . . . ? 
C6 V1 C10 C8 121.7(3) . . . . ? 
C28 V1 C10 C8 22.4(3) . . . . ? 
C11 V1 C10 C8 52.9(3) . . . . ? 
C9 V1 C10 C8 143.7(4) . . . . ? 
C13 V1 C10 C8 -151.3(4) . . . . ? 
C20 V1 C10 C8 -72.6(3) . . . . ? 
C12 V1 C10 C8 -54.4(4) . . . . ? 
C4 V1 C10 C8 -143.9(3) . . . . ? 
C7 V1 C10 C8 -109.2(3) . . . . ? 
C5 V1 C10 C9 -52.9(2) . . . . ? 
C6 V1 C10 C9 -22.0(2) . . . . ? 
C8 V1 C10 C9 -143.7(4) . . . . ? 
C28 V1 C10 C9 -121.3(3) . . . . ? 
C11 V1 C10 C9 -90.8(2) . . . . ? 
C13 V1 C10 C9 65.0(5) . . . . ? 
C20 V1 C10 C9 143.7(2) . . . . ? 
C12 V1 C10 C9 161.9(2) . . . . ? 
C4 V1 C10 C9 72.4(3) . . . . ? 
C7 V1 C10 C9 107.1(2) . . . . ? 
C6 C5 C11 C28 -0.6(5) . . . . ? 
V1 C5 C11 C28 46.0(3) . . . . ? 
C6 C5 C11 B1 -168.6(3) . . . . ? 
V1 C5 C11 B1 -122.0(2) . . . . ? 
C6 C5 C11 V1 -46.6(3) . . . . ? 
N1 B1 C11 C5 -131.0(3) . . . . ? 
Pt1 B1 C11 C5 48.7(3) . . . . ? 
N1 B1 C11 C28 59.7(4) . . . . ? 
Pt1 B1 C11 C28 -120.6(3) . . . . ? 
N1 B1 C11 V1 143.6(2) . . . . ? 
Pt1 B1 C11 V1 -36.7(3) . . . . ? 
C6 V1 C11 C5 22.75(18) . . . . ? 
C8 V1 C11 C5 121.6(2) . . . . ? 
C28 V1 C11 C5 141.9(3) . . . . ? 
C10 V1 C11 C5 91.0(2) . . . . ? 
C9 V1 C11 C5 53.4(2) . . . . ? 
C13 V1 C11 C5 -79.59(17) . . . . ? 
C20 V1 C11 C5 -145.10(17) . . . . ? 
C12 V1 C11 C5 -115.56(17) . . . . ? 
C4 V1 C11 C5 -65.8(2) . . . . ? 
C7 V1 C11 C5 -134.8(3) . . . . ? 
C5 V1 C11 C28 -141.9(3) . . . . ? 
C6 V1 C11 C28 -119.1(2) . . . . ? 
C8 V1 C11 C28 -20.2(3) . . . . ? 
C10 V1 C11 C28 -50.9(3) . . . . ? 
C9 V1 C11 C28 -88.4(3) . . . . ? 
C13 V1 C11 C28 138.6(2) . . . . ? 
C20 V1 C11 C28 73.0(2) . . . . ? 
C12 V1 C11 C28 102.6(2) . . . . ? 
C4 V1 C11 C28 152.4(2) . . . . ? 
C7 V1 C11 C28 83.4(3) . . . . ? 
C5 V1 C11 B1 111.1(3) . . . . ? 
C6 V1 C11 B1 133.9(3) . . . . ? 
C8 V1 C11 B1 -127.2(3) . . . . ? 
C28 V1 C11 B1 -107.0(4) . . . . ? 
C10 V1 C11 B1 -157.9(3) . . . . ? 
C9 V1 C11 B1 164.6(3) . . . . ? 
C13 V1 C11 B1 31.6(3) . . . . ? 
C20 V1 C11 B1 -34.0(3) . . . . ? 
C12 V1 C11 B1 -4.4(3) . . . . ? 
C4 V1 C11 B1 45.4(3) . . . . ? 
C7 V1 C11 B1 -23.6(5) . . . . ? 
C18 C2 P2 C3 -171.9(2) . . . . ? 
C18 C2 P2 C1 -67.3(2) . . . . ? 
C18 C2 P2 Pt1 60.8(2) . . . . ? 
C21 C3 P2 C2 170.2(2) . . . . ? 
C21 C3 P2 C1 65.6(3) . . . . ? 
C21 C3 P2 Pt1 -60.6(3) . . . . ? 
C16 C1 P2 C2 -50.7(3) . . . . ? 
C16 C1 P2 C3 51.8(3) . . . . ? 
C16 C1 P2 Pt1 178.7(3) . . . . ? 
B1 Pt1 P2 C2 -143.3(4) . . . . ? 
B2 Pt1 P2 C2 -124.77(13) . . . . ? 
P1 Pt1 P2 C2 49.84(10) . . . . ? 
B1 Pt1 P2 C3 97.8(4) . . . . ? 
B2 Pt1 P2 C3 116.27(14) . . . . ? 
P1 Pt1 P2 C3 -69.12(11) . . . . ? 
B1 Pt1 P2 C1 -21.5(4) . . . . ? 
B2 Pt1 P2 C1 -3.04(16) . . . . ? 
P1 Pt1 P2 C1 171.57(14) . . . . ? 
B1 Pt1 B2 N2 93.3(3) . . . . ? 
P1 Pt1 B2 N2 128.2(4) . . . . ? 
P2 Pt1 B2 N2 -82.3(2) . . . . ? 
B1 Pt1 B2 C12 -90.0(2) . . . . ? 
P1 Pt1 B2 C12 -55.1(6) . . . . ? 
P2 Pt1 B2 C12 94.5(2) . . . . ? 
B1 Pt1 P1 C23 -132.68(13) . . . . ? 
B2 Pt1 P1 C23 -166.7(5) . . . . ? 
P2 Pt1 P1 C23 44.24(11) . . . . ? 
B1 Pt1 P1 C14 108.21(13) . . . . ? 
B2 Pt1 P1 C14 74.2(5) . . . . ? 
P2 Pt1 P1 C14 -74.88(11) . . . . ? 
B1 Pt1 P1 C15 -12.57(13) . . . . ? 
B2 Pt1 P1 C15 -46.6(5) . . . . ? 
P2 Pt1 P1 C15 164.34(10) . . . . ? 
C11 B1 N1 C19 -175.1(3) . . . . ? 
Pt1 B1 N1 C19 5.2(4) . . . . ? 
C11 B1 N1 C22 8.1(5) . . . . ? 
Pt1 B1 N1 C22 -171.6(3) . . . . ? 
N2 B2 C12 C13 162.1(3) . . . . ? 
Pt1 B2 C12 C13 -14.8(4) . . . . ? 
N2 B2 C12 C20 -28.8(5) . . . . ? 
Pt1 B2 C12 C20 154.2(3) . . . . ? 
N2 B2 C12 V1 -114.4(2) . . . . ? 
Pt1 B2 C12 V1 68.7(2) . . . . ? 
C5 V1 C12 C13 75.84(18) . . . . ? 
C6 V1 C12 C13 44.4(2) . . . . ? 
C8 V1 C12 C13 -176.97(18) . . . . ? 
C28 V1 C12 C13 149.35(17) . . . . ? 
C10 V1 C12 C13 -141.1(3) . . . . ? 
C11 V1 C12 C13 111.52(16) . . . . ? 
C9 V1 C12 C13 -14.4(6) . . . . ? 
C20 V1 C12 C13 -113.7(2) . . . . ? 
C4 V1 C12 C13 -35.95(16) . . . . ? 
C7 V1 C12 C13 -77.41(18) . . . . ? 
C5 V1 C12 C20 -170.41(19) . . . . ? 
C6 V1 C12 C20 158.1(2) . . . . ? 
C8 V1 C12 C20 -63.2(2) . . . . ? 
C28 V1 C12 C20 -96.9(2) . . . . ? 
C10 V1 C12 C20 -27.3(4) . . . . ? 
C11 V1 C12 C20 -134.7(2) . . . . ? 
C9 V1 C12 C20 99.3(6) . . . . ? 
C13 V1 C12 C20 113.7(2) . . . . ? 
C4 V1 C12 C20 77.8(2) . . . . ? 
C7 V1 C12 C20 36.34(19) . . . . ? 
C5 V1 C12 B2 -44.7(2) . . . . ? 
C6 V1 C12 B2 -76.2(3) . . . . ? 
C8 V1 C12 B2 62.4(2) . . . . ? 
C28 V1 C12 B2 28.8(2) . . . . ? 
C10 V1 C12 B2 98.4(3) . . . . ? 
C11 V1 C12 B2 -9.1(2) . . . . ? 
C9 V1 C12 B2 -135.0(6) . . . . ? 
C13 V1 C12 B2 -120.6(3) . . . . ? 
C20 V1 C12 B2 125.7(3) . . . . ? 
C4 V1 C12 B2 -156.5(2) . . . . ? 
C7 V1 C12 B2 162.0(2) . . . . ? 
C7 C4 C13 C12 0.7(3) . . . . ? 
V1 C4 C13 C12 -62.19(19) . . . . ? 
C7 C4 C13 V1 62.9(2) . . . . ? 
C20 C12 C13 C4 -0.8(3) . . . . ? 
B2 C12 C13 C4 170.5(2) . . . . ? 
V1 C12 C13 C4 62.39(19) . . . . ? 
C20 C12 C13 V1 -63.2(2) . . . . ? 
B2 C12 C13 V1 108.1(3) . . . . ? 
C5 V1 C13 C4 128.19(17) . . . . ? 
C6 V1 C13 C4 90.47(18) . . . . ? 
C8 V1 C13 C4 -112.1(4) . . . . ? 
C28 V1 C13 C4 -161.4(2) . . . . ? 
C10 V1 C13 C4 10.7(5) . . . . ? 
C11 V1 C13 C4 165.55(17) . . . . ? 
C9 V1 C13 C4 56.2(2) . . . . ? 
C20 V1 C13 C4 -80.02(18) . . . . ? 
C12 V1 C13 C4 -119.5(2) . . . . ? 
C7 V1 C13 C4 -37.57(17) . . . . ? 
C5 V1 C13 C12 -112.31(16) . . . . ? 
C6 V1 C13 C12 -150.04(16) . . . . ? 
C8 V1 C13 C12 7.4(4) . . . . ? 
C28 V1 C13 C12 -41.9(2) . . . . ? 
C10 V1 C13 C12 130.2(5) . . . . ? 
C11 V1 C13 C12 -74.95(17) . . . . ? 
C9 V1 C13 C12 175.65(18) . . . . ? 
C20 V1 C13 C12 39.47(16) . . . . ? 
C4 V1 C13 C12 119.5(2) . . . . ? 
C7 V1 C13 C12 81.93(17) . . . . ? 
C23 P1 C14 C25 49.8(3) . . . . ? 
C15 P1 C14 C25 -52.2(3) . . . . ? 
Pt1 P1 C14 C25 177.6(2) . . . . ? 
C23 P1 C15 C17 -162.8(2) . . . . ? 
C14 P1 C15 C17 -58.3(2) . . . . ? 
Pt1 P1 C15 C17 67.9(2) . . . . ? 
C4 C7 C20 C12 -0.2(4) . . . . ? 
V1 C7 C20 C12 62.2(2) . . . . ? 
C4 C7 C20 V1 -62.4(2) . . . . ? 
C13 C12 C20 C7 0.6(4) . . . . ? 
B2 C12 C20 C7 -170.2(3) . . . . ? 
V1 C12 C20 C7 -62.5(2) . . . . ? 
C13 C12 C20 V1 63.11(18) . . . . ? 
B2 C12 C20 V1 -107.7(3) . . . . ? 
C5 V1 C20 C7 134.9(2) . . . . ? 
C6 V1 C20 C7 42.4(5) . . . . ? 
C8 V1 C20 C7 -111.3(2) . . . . ? 
C28 V1 C20 C7 -149.9(2) . . . . ? 
C10 V1 C20 C7 -75.0(3) . . . . ? 
C11 V1 C20 C7 172.84(19) . . . . ? 
C9 V1 C20 C7 -38.6(4) . . . . ? 
C13 V1 C20 C7 79.5(2) . . . . ? 
C12 V1 C20 C7 118.9(3) . . . . ? 
C4 V1 C20 C7 37.3(2) . . . . ? 
C5 V1 C20 C12 16.1(3) . . . . ? 
C6 V1 C20 C12 -76.5(5) . . . . ? 
C8 V1 C20 C12 129.80(19) . . . . ? 
C28 V1 C20 C12 91.21(19) . . . . ? 
C10 V1 C20 C12 166.1(2) . . . . ? 
C11 V1 C20 C12 54.0(2) . . . . ? 
C9 V1 C20 C12 -157.5(3) . . . . ? 
C13 V1 C20 C12 -39.34(17) . . . . ? 
C4 V1 C20 C12 -81.6(2) . . . . ? 
C7 V1 C20 C12 -118.9(3) . . . . ? 
C12 B2 N2 C26 171.1(3) . . . . ? 
Pt1 B2 N2 C26 -12.2(4) . . . . ? 
C12 B2 N2 C27 -13.4(5) . . . . ? 
Pt1 B2 N2 C27 163.3(3) . . . . ? 
C14 P1 C23 C24 -178.1(2) . . . . ? 
C15 P1 C23 C24 -73.4(2) . . . . ? 
Pt1 P1 C23 C24 57.0(2) . . . . ? 
C10 C8 C28 C11 3.7(8) . . . . ? 
V1 C8 C28 C11 -41.9(4) . . . . ? 
C10 C8 C28 V1 45.6(4) . . . . ? 
C5 C11 C28 C8 -3.8(6) . . . . ? 
B1 C11 C28 C8 164.6(4) . . . . ? 
V1 C11 C28 C8 41.9(4) . . . . ? 
C5 C11 C28 V1 -45.6(3) . . . . ? 
B1 C11 C28 V1 122.8(2) . . . . ? 
C5 V1 C28 C8 -123.8(3) . . . . ? 
C6 V1 C28 C8 -91.4(3) . . . . ? 
C10 V1 C28 C8 -22.3(3) . . . . ? 
C11 V1 C28 C8 -147.4(4) . . . . ? 
C9 V1 C28 C8 -53.7(3) . . . . ? 
C13 V1 C28 C8 154.5(3) . . . . ? 
C20 V1 C28 C8 91.8(3) . . . . ? 
C12 V1 C28 C8 130.1(3) . . . . ? 
C4 V1 C28 C8 113.9(5) . . . . ? 
C7 V1 C28 C8 67.4(4) . . . . ? 
C5 V1 C28 C11 23.60(18) . . . . ? 
C6 V1 C28 C11 56.1(2) . . . . ? 
C8 V1 C28 C11 147.4(4) . . . . ? 
C10 V1 C28 C11 125.1(3) . . . . ? 
C9 V1 C28 C11 93.8(2) . . . . ? 
C13 V1 C28 C11 -58.1(3) . . . . ? 
C20 V1 C28 C11 -120.7(2) . . . . ? 
C12 V1 C28 C11 -82.5(2) . . . . ? 
C4 V1 C28 C11 -98.7(5) . . . . ? 
C7 V1 C28 C11 -145.17(19) . . . . ? 
 
_diffrn_measured_fraction_theta_max    0.998 
_diffrn_reflns_theta_full              26.00 
_diffrn_measured_fraction_theta_full   0.999 
_refine_diff_density_max    1.576 
_refine_diff_density_min   -0.793 
_refine_diff_density_rms    0.095 

#===end

data_kr105 
_audit_creation_method            SHELXL-97 
_chemical_name_systematic 
; 
Cyclopentadienylcycloheptatrienybis(trimethylsilylamino)borylvandadium
; 
_chemical_name_common             
;
Cyclopentadienylcycloheptatrienybis(trimethylsilylamino)borylvandadium
; 
_chemical_melting_point           ? 
_chemical_formula_moiety          
'C18 H28 B N Si2 V'
 
_chemical_formula_sum 
 'C18 H28 B N Si2 V' 
_chemical_formula_weight          376.34 
 
loop_ 
 _atom_type_symbol 
 _atom_type_description 
 _atom_type_scat_dispersion_real 
 _atom_type_scat_dispersion_imag 
 _atom_type_scat_source 
 'C'  'C'   0.0033   0.0016 
 'International Tables Vol C Tables 4.2.6.8 and 6.1.1.4' 
 'H'  'H'   0.0000   0.0000 
 'International Tables Vol C Tables 4.2.6.8 and 6.1.1.4' 
 'B'  'B'   0.0013   0.0007 
 'International Tables Vol C Tables 4.2.6.8 and 6.1.1.4' 
 'N'  'N'   0.0061   0.0033 
 'International Tables Vol C Tables 4.2.6.8 and 6.1.1.4' 
 'Si'  'Si'   0.0817   0.0704 
 'International Tables Vol C Tables 4.2.6.8 and 6.1.1.4' 
 'V'  'V'   0.3005   0.5294 
 'International Tables Vol C Tables 4.2.6.8 and 6.1.1.4' 
 
_symmetry_cell_setting            'Monoclinic' 
_symmetry_space_group_name_H-M    'P2(1)/c'
_symmetry_space_group_name_Hall   '-P 2ybc' 
 
loop_ 
 _symmetry_equiv_pos_as_xyz 
 'x, y, z' 
 '-x, y+1/2, -z+1/2' 
 '-x, -y, -z' 
 'x, -y-1/2, z-1/2' 
 
_cell_length_a                    15.0474(6) 
_cell_length_b                    12.3241(5) 
_cell_length_c                    10.9891(4) 
_cell_angle_alpha                 90.00 
_cell_angle_beta                  107.566(2) 
_cell_angle_gamma                 90.00 
_cell_volume                      1942.85(13) 
_cell_formula_units_Z             4 
_cell_measurement_temperature     273(2) 
_cell_measurement_reflns_used     9706 
_cell_measurement_theta_min       2.18 
_cell_measurement_theta_max       33.74 
 
_exptl_crystal_description        'plate' 
_exptl_crystal_colour             'violet' 
_exptl_crystal_size_max           0.24 
_exptl_crystal_size_mid           0.16 
_exptl_crystal_size_min           0.05 
_exptl_crystal_density_meas       ? 
_exptl_crystal_density_diffrn     1.287 
_exptl_crystal_density_method     'not measured' 
_exptl_crystal_F_000              796 
_exptl_absorpt_coefficient_mu     0.632 
_exptl_absorpt_correction_type    'multi-scan' 
_exptl_absorpt_correction_T_min   0.8631 
_exptl_absorpt_correction_T_max   0.9691 
_exptl_absorpt_process_details    'Sadabs 2004/1 (Brucker Nonius 2004)' 
 
_exptl_special_details 
; 
 ? 
; 
 
_diffrn_ambient_temperature       273(2) 
_diffrn_radiation_wavelength      0.71073 
_diffrn_radiation_type            MoK\a 
_diffrn_radiation_source          'rotating anode' 
_diffrn_radiation_monochromator   'multi-layer mirror' 
_diffrn_measurement_device_type   'CCD area detector' 
_diffrn_measurement_method        'phi and omega scans' 
_diffrn_detector_area_resol_mean  ? 
_diffrn_standards_number          ? 
_diffrn_standards_interval_count  ? 
_diffrn_standards_interval_time   ? 
_diffrn_standards_decay_%         ? 
_diffrn_reflns_number             97042 
_diffrn_reflns_av_R_equivalents   0.0456 
_diffrn_reflns_av_sigmaI/netI     0.0260 
_diffrn_reflns_limit_h_min        -22 
_diffrn_reflns_limit_h_max        21 
_diffrn_reflns_limit_k_min        -18 
_diffrn_reflns_limit_k_max        19 
_diffrn_reflns_limit_l_min        -14 
_diffrn_reflns_limit_l_max        17 
_diffrn_reflns_theta_min          2.18 
_diffrn_reflns_theta_max          34.29 
_reflns_number_total              7008 
_reflns_number_gt                 5943 
_reflns_threshold_expression      >2sigma(I) 
 
_computing_data_collection        'APEX2 ver. 1.0-27 (Bruker AXS)' 
_computing_cell_refinement        'Saint+ ver. 7.12A (Bruker AXS)' 
_computing_data_reduction         'Saint+ ver. 7.12A (Bruker AXS)' 
_computing_structure_solution     'SHELXS-97 (Sheldrick, 1990)' 
_computing_structure_refinement   'SHELXL-97 (Sheldrick, 1997)' 
_computing_molecular_graphics     'XP ver. 5.1 (Bruker AXS, 1998)' 
_computing_publication_material   'SHELXL-97 (Sheldrick, 1997)' 
 
_refine_special_details 
; 
 Refinement of F^2^ against ALL reflections.  The weighted R-factor wR and 
 goodness of fit S are based on F^2^, conventional R-factors R are based 
 on F, with F set to zero for negative F^2^. The threshold expression of 
 F^2^ > 2sigma(F^2^) is used only for calculating R-factors(gt) etc. and is 
 not relevant to the choice of reflections for refinement.  R-factors based 
 on F^2^ are statistically about twice as large as those based on F, and R- 
 factors based on ALL data will be even larger. 
; 
 
_refine_ls_structure_factor_coef  Fsqd  
_refine_ls_matrix_type            full 
_refine_ls_weighting_scheme       calc  
_refine_ls_weighting_details 
 'calc w=1/[\s^2^(Fo^2^)+(0.0368P)^2^+1.3328P] where P=(Fo^2^+2Fc^2^)/3' 
_atom_sites_solution_primary      direct 
_atom_sites_solution_secondary    difmap 
_atom_sites_solution_hydrogens    geom 
_refine_ls_hydrogen_treatment     constr 
_refine_ls_extinction_method      none 
_refine_ls_extinction_coef        ? 
_refine_ls_number_reflns          7008 
_refine_ls_number_parameters      208 
_refine_ls_number_restraints      0 
_refine_ls_R_factor_all           0.0432 
_refine_ls_R_factor_gt            0.0328 
_refine_ls_wR_factor_ref          0.0871 
_refine_ls_wR_factor_gt           0.0808 
_refine_ls_goodness_of_fit_ref    1.050 
_refine_ls_restrained_S_all       1.050 
_refine_ls_shift/su_max           0.001 
_refine_ls_shift/su_mean          0.000 
 
loop_ 
 _atom_site_label 
 _atom_site_type_symbol 
 _atom_site_fract_x 
 _atom_site_fract_y 
 _atom_site_fract_z 
 _atom_site_U_iso_or_equiv 
 _atom_site_adp_type 
 _atom_site_occupancy 
 _atom_site_symmetry_multiplicity 
 _atom_site_calc_flag 
 _atom_site_refinement_flags 
 _atom_site_disorder_assembly 
 _atom_site_disorder_group 
V1 V 0.329999(13) 0.648858(15) 0.117190(18) 0.00989(5) Uani 1 1 d . . . 
Si1 Si 0.26708(2) 0.41124(3) 0.48851(3) 0.01369(7) Uani 1 1 d . . . 
B1 B 0.24512(9) 0.53051(10) 0.26547(12) 0.0117(2) Uani 1 1 d . . . 
N1 N 0.20179(6) 0.47220(8) 0.34207(9) 0.01108(17) Uani 1 1 d . . . 
Si2 Si 0.07895(2) 0.45089(3) 0.27516(3) 0.01201(7) Uani 1 1 d . . . 
C11 C 0.19587(8) 0.58440(9) 0.12692(11) 0.0123(2) Uani 1 1 d . . . 
C12 C 0.18582(8) 0.69996(9) 0.10830(11) 0.0137(2) Uani 1 1 d . . . 
H12A H 0.1739 0.7486 0.1662 0.016 Uiso 1 1 calc R . . 
C13 C 0.19680(8) 0.72862(10) -0.01148(12) 0.0155(2) Uani 1 1 d . . . 
H13A H 0.1944 0.7984 -0.0446 0.019 Uiso 1 1 calc R . . 
C14 C 0.21209(8) 0.63142(10) -0.07144(11) 0.0153(2) Uani 1 1 d . . . 
H14A H 0.2214 0.6261 -0.1511 0.018 Uiso 1 1 calc R . . 
C15 C 0.21060(8) 0.54384(9) 0.01169(11) 0.0141(2) Uani 1 1 d . . . 
H15A H 0.2180 0.4711 -0.0057 0.017 Uiso 1 1 calc R . . 
C21 C 0.35335(8) 0.56248(9) 0.29006(11) 0.0119(2) Uani 1 1 d . . . 
C22 C 0.37064(8) 0.67475(10) 0.32218(11) 0.0137(2) Uani 1 1 d . . . 
H22A H 0.3479 0.6996 0.3870 0.016 Uiso 1 1 calc R . . 
C23 C 0.41735(8) 0.75393(10) 0.26997(12) 0.0158(2) Uani 1 1 d . . . 
H23A H 0.4181 0.8235 0.3030 0.019 Uiso 1 1 calc R . . 
C24 C 0.46272(8) 0.74280(10) 0.17544(12) 0.0171(2) Uani 1 1 d . . . 
H24A H 0.4860 0.8063 0.1508 0.020 Uiso 1 1 calc R . . 
C25 C 0.47700(9) 0.64650(10) 0.11369(13) 0.0176(2) Uani 1 1 d . . . 
H25A H 0.5087 0.6543 0.0535 0.021 Uiso 1 1 calc R . . 
C26 C 0.44894(9) 0.53974(10) 0.13243(12) 0.0169(2) Uani 1 1 d . . . 
H26A H 0.4681 0.4862 0.0862 0.020 Uiso 1 1 calc R . . 
C27 C 0.39584(8) 0.50213(9) 0.21132(11) 0.0144(2) Uani 1 1 d . . . 
H27A H 0.3875 0.4274 0.2118 0.017 Uiso 1 1 calc R . . 
C31 C 0.05806(9) 0.36658(11) 0.12891(13) 0.0209(3) Uani 1 1 d . . . 
H31A H 0.0838 0.4023 0.0696 0.031 Uiso 1 1 calc R . . 
H31B H -0.0078 0.3568 0.0905 0.031 Uiso 1 1 calc R . . 
H31C H 0.0873 0.2971 0.1512 0.031 Uiso 1 1 calc R . . 
C32 C 0.02758(9) 0.37703(11) 0.38637(13) 0.0208(2) Uani 1 1 d . . . 
H32A H 0.0369 0.4187 0.4630 0.031 Uiso 1 1 calc R . . 
H32B H 0.0574 0.3077 0.4072 0.031 Uiso 1 1 calc R . . 
H32C H -0.0380 0.3667 0.3461 0.031 Uiso 1 1 calc R . . 
C33 C 0.01589(8) 0.58299(10) 0.24301(13) 0.0185(2) Uani 1 1 d . . . 
H33A H 0.0390 0.6252 0.1856 0.028 Uiso 1 1 calc R . . 
H33B H 0.0258 0.6219 0.3217 0.028 Uiso 1 1 calc R . . 
H33C H -0.0496 0.5700 0.2052 0.028 Uiso 1 1 calc R . . 
C41 C 0.39299(10) 0.44260(15) 0.53655(15) 0.0314(4) Uani 1 1 d . . . 
H41A H 0.4018 0.5196 0.5471 0.047 Uiso 1 1 calc R . . 
H41B H 0.4190 0.4177 0.4718 0.047 Uiso 1 1 calc R . . 
H41C H 0.4236 0.4068 0.6157 0.047 Uiso 1 1 calc R . . 
C42 C 0.25678(12) 0.26092(12) 0.47083(18) 0.0366(4) Uani 1 1 d . . . 
H42A H 0.1922 0.2406 0.4461 0.055 Uiso 1 1 calc R . . 
H42B H 0.2889 0.2271 0.5507 0.055 Uiso 1 1 calc R . . 
H42C H 0.2839 0.2376 0.4066 0.055 Uiso 1 1 calc R . . 
C43 C 0.22363(13) 0.45950(16) 0.62117(15) 0.0370(4) Uani 1 1 d . . . 
H43A H 0.2296 0.5370 0.6282 0.056 Uiso 1 1 calc R . . 
H43B H 0.2596 0.4266 0.6998 0.056 Uiso 1 1 calc R . . 
H43C H 0.1593 0.4397 0.6037 0.056 Uiso 1 1 calc R . . 
 
loop_ 
 _atom_site_aniso_label 
 _atom_site_aniso_U_11 
 _atom_site_aniso_U_22 
 _atom_site_aniso_U_33 
 _atom_site_aniso_U_23 
 _atom_site_aniso_U_13 
 _atom_site_aniso_U_12 
V1 0.01057(9) 0.00970(8) 0.00952(9) 0.00053(6) 0.00322(6) -0.00019(6) 
Si1 0.01392(15) 0.01416(14) 0.01249(15) 0.00428(11) 0.00320(11) -0.00025(11) 
B1 0.0116(5) 0.0117(5) 0.0113(5) 0.0007(4) 0.0028(4) -0.0002(4) 
N1 0.0110(4) 0.0113(4) 0.0108(4) 0.0012(3) 0.0030(3) -0.0008(3) 
Si2 0.01065(14) 0.01192(13) 0.01339(15) 0.00014(11) 0.00349(11) -0.00187(10) 
C11 0.0098(4) 0.0141(5) 0.0121(5) 0.0024(4) 0.0020(4) -0.0015(4) 
C12 0.0116(5) 0.0144(5) 0.0145(5) 0.0012(4) 0.0029(4) 0.0020(4) 
C13 0.0136(5) 0.0150(5) 0.0163(5) 0.0049(4) 0.0020(4) 0.0002(4) 
C14 0.0159(5) 0.0184(5) 0.0103(5) 0.0016(4) 0.0020(4) -0.0019(4) 
C15 0.0152(5) 0.0131(5) 0.0122(5) -0.0003(4) 0.0013(4) -0.0028(4) 
C21 0.0106(4) 0.0147(5) 0.0101(5) 0.0026(4) 0.0024(4) -0.0003(4) 
C22 0.0129(5) 0.0172(5) 0.0108(5) -0.0026(4) 0.0031(4) -0.0011(4) 
C23 0.0156(5) 0.0140(5) 0.0158(5) -0.0026(4) 0.0019(4) -0.0026(4) 
C24 0.0148(5) 0.0170(5) 0.0187(6) 0.0030(4) 0.0041(4) -0.0043(4) 
C25 0.0143(5) 0.0231(6) 0.0177(6) 0.0031(4) 0.0083(4) 0.0007(4) 
C26 0.0167(5) 0.0177(5) 0.0183(6) 0.0001(4) 0.0083(4) 0.0049(4) 
C27 0.0142(5) 0.0122(4) 0.0163(5) 0.0025(4) 0.0040(4) 0.0020(4) 
C31 0.0195(6) 0.0236(6) 0.0191(6) -0.0066(5) 0.0051(5) -0.0076(5) 
C32 0.0174(6) 0.0228(6) 0.0237(6) 0.0042(5) 0.0086(5) -0.0049(5) 
C33 0.0141(5) 0.0175(5) 0.0239(6) 0.0032(5) 0.0059(4) 0.0020(4) 
C41 0.0178(6) 0.0475(9) 0.0228(7) 0.0192(6) -0.0031(5) -0.0064(6) 
C42 0.0381(9) 0.0162(6) 0.0463(10) 0.0094(6) -0.0010(7) 0.0018(6) 
C43 0.0413(9) 0.0554(11) 0.0165(7) 0.0056(7) 0.0119(6) 0.0140(8) 
 
_geom_special_details 
; 
 All esds (except the esd in the dihedral angle between two l.s. planes) 
 are estimated using the full covariance matrix.  The cell esds are taken 
 into account individually in the estimation of esds in distances, angles 
 and torsion angles; correlations between esds in cell parameters are only 
 used when they are defined by crystal symmetry.  An approximate (isotropic) 
 treatment of cell esds is used for estimating esds involving l.s. planes. 
; 
 
loop_ 
 _geom_bond_atom_site_label_1 
 _geom_bond_atom_site_label_2 
 _geom_bond_distance 
 _geom_bond_site_symmetry_2 
 _geom_bond_publ_flag 
V1 C21 2.1125(11) . ? 
V1 C27 2.1686(11) . ? 
V1 C22 2.1722(12) . ? 
V1 C11 2.2015(11) . ? 
V1 C26 2.2043(12) . ? 
V1 C23 2.2116(12) . ? 
V1 C25 2.2240(13) . ? 
V1 C24 2.2287(12) . ? 
V1 C12 2.2327(12) . ? 
V1 C15 2.2338(11) . ? 
V1 C14 2.2958(12) . ? 
V1 C13 2.2961(12) . ? 
Si1 N1 1.7791(10) . ? 
Si1 C41 1.8476(14) . ? 
Si1 C42 1.8643(15) . ? 
Si1 C43 1.8660(17) . ? 
B1 N1 1.4075(16) . ? 
B1 C21 1.6170(17) . ? 
B1 C11 1.6209(17) . ? 
N1 Si2 1.7906(10) . ? 
Si2 C31 1.8591(13) . ? 
Si2 C33 1.8637(13) . ? 
Si2 C32 1.8681(14) . ? 
C11 C15 1.4395(17) . ? 
C11 C12 1.4403(16) . ? 
C12 C13 1.4199(17) . ? 
C12 H12A 0.9300 . ? 
C13 C14 1.4189(17) . ? 
C13 H13A 0.9300 . ? 
C14 C15 1.4186(16) . ? 
C14 H14A 0.9300 . ? 
C15 H15A 0.9300 . ? 
C21 C27 1.4299(17) . ? 
C21 C22 1.4323(16) . ? 
C22 C23 1.4207(17) . ? 
C22 H22A 0.9300 . ? 
C23 C24 1.4115(19) . ? 
C23 H23A 0.9300 . ? 
C24 C25 1.4153(18) . ? 
C24 H24A 0.9300 . ? 
C25 C26 1.4156(18) . ? 
C25 H25A 0.9300 . ? 
C26 C27 1.4224(18) . ? 
C26 H26A 0.9300 . ? 
C27 H27A 0.9300 . ? 
C31 H31A 0.9600 . ? 
C31 H31B 0.9600 . ? 
C31 H31C 0.9600 . ? 
C32 H32A 0.9600 . ? 
C32 H32B 0.9600 . ? 
C32 H32C 0.9600 . ? 
C33 H33A 0.9600 . ? 
C33 H33B 0.9600 . ? 
C33 H33C 0.9600 . ? 
C41 H41A 0.9600 . ? 
C41 H41B 0.9600 . ? 
C41 H41C 0.9600 . ? 
C42 H42A 0.9600 . ? 
C42 H42B 0.9600 . ? 
C42 H42C 0.9600 . ? 
C43 H43A 0.9600 . ? 
C43 H43B 0.9600 . ? 
C43 H43C 0.9600 . ? 
 
loop_ 
 _geom_angle_atom_site_label_1 
 _geom_angle_atom_site_label_2 
 _geom_angle_atom_site_label_3 
 _geom_angle 
 _geom_angle_site_symmetry_1 
 _geom_angle_site_symmetry_3 
 _geom_angle_publ_flag 
C21 V1 C27 39.00(5) . . ? 
C21 V1 C22 39.03(4) . . ? 
C27 V1 C22 71.50(5) . . ? 
C21 V1 C11 71.37(4) . . ? 
C27 V1 C11 88.25(4) . . ? 
C22 V1 C11 88.74(4) . . ? 
C21 V1 C26 73.34(5) . . ? 
C27 V1 C26 37.95(5) . . ? 
C22 V1 C26 92.45(5) . . ? 
C11 V1 C26 120.76(5) . . ? 
C21 V1 C23 73.32(4) . . ? 
C27 V1 C23 92.57(4) . . ? 
C22 V1 C23 37.81(4) . . ? 
C11 V1 C23 121.19(5) . . ? 
C26 V1 C23 90.95(5) . . ? 
C21 V1 C25 96.47(5) . . ? 
C27 V1 C25 71.57(5) . . ? 
C22 V1 C25 92.84(5) . . ? 
C11 V1 C25 158.02(5) . . ? 
C26 V1 C25 37.28(5) . . ? 
C23 V1 C25 69.79(5) . . ? 
C21 V1 C24 96.44(4) . . ? 
C27 V1 C24 93.18(4) . . ? 
C22 V1 C24 71.24(5) . . ? 
C11 V1 C24 158.24(5) . . ? 
C26 V1 C24 70.03(5) . . ? 
C23 V1 C24 37.07(5) . . ? 
C25 V1 C24 37.07(5) . . ? 
C21 V1 C12 94.43(4) . . ? 
C27 V1 C12 123.65(5) . . ? 
C22 V1 C12 88.26(4) . . ? 
C11 V1 C12 37.90(4) . . ? 
C26 V1 C12 158.65(5) . . ? 
C23 V1 C12 102.42(5) . . ? 
C25 V1 C12 164.00(5) . . ? 
C24 V1 C12 129.84(5) . . ? 
C21 V1 C15 93.68(4) . . ? 
C27 V1 C15 86.82(4) . . ? 
C22 V1 C15 123.64(5) . . ? 
C11 V1 C15 37.87(4) . . ? 
C26 V1 C15 101.15(5) . . ? 
C23 V1 C15 159.05(5) . . ? 
C25 V1 C15 129.18(5) . . ? 
C24 V1 C15 163.88(5) . . ? 
C12 V1 C15 61.45(4) . . ? 
C21 V1 C14 129.66(4) . . ? 
C27 V1 C14 118.03(4) . . ? 
C22 V1 C14 148.11(5) . . ? 
C11 V1 C14 62.62(4) . . ? 
C26 V1 C14 113.58(5) . . ? 
C23 V1 C14 149.37(4) . . ? 
C25 V1 C14 119.00(5) . . ? 
C24 V1 C14 133.57(5) . . ? 
C12 V1 C14 60.72(5) . . ? 
C15 V1 C14 36.47(4) . . ? 
C21 V1 C13 130.31(4) . . ? 
C27 V1 C13 147.03(4) . . ? 
C22 V1 C13 119.73(5) . . ? 
C11 V1 C13 62.72(4) . . ? 
C26 V1 C13 147.76(5) . . ? 
C23 V1 C13 115.16(4) . . ? 
C25 V1 C13 133.06(5) . . ? 
C24 V1 C13 119.63(4) . . ? 
C12 V1 C13 36.51(4) . . ? 
C15 V1 C13 60.83(4) . . ? 
C14 V1 C13 36.00(4) . . ? 
N1 Si1 C41 114.13(6) . . ? 
N1 Si1 C42 108.63(6) . . ? 
C41 Si1 C42 106.47(8) . . ? 
N1 Si1 C43 110.12(6) . . ? 
C41 Si1 C43 106.32(9) . . ? 
C42 Si1 C43 111.13(9) . . ? 
N1 B1 C21 130.49(10) . . ? 
N1 B1 C11 127.44(10) . . ? 
C21 B1 C11 102.06(9) . . ? 
B1 N1 Si1 121.84(8) . . ? 
B1 N1 Si2 115.88(8) . . ? 
Si1 N1 Si2 121.96(6) . . ? 
N1 Si2 C31 108.74(6) . . ? 
N1 Si2 C33 110.68(5) . . ? 
C31 Si2 C33 112.38(6) . . ? 
N1 Si2 C32 112.49(5) . . ? 
C31 Si2 C32 107.32(6) . . ? 
C33 Si2 C32 105.20(6) . . ? 
C15 C11 C12 104.82(10) . . ? 
C15 C11 B1 122.41(10) . . ? 
C12 C11 B1 122.49(10) . . ? 
C15 C11 V1 72.28(7) . . ? 
C12 C11 V1 72.23(6) . . ? 
B1 C11 V1 91.58(6) . . ? 
C13 C12 C11 109.94(11) . . ? 
C13 C12 V1 74.17(7) . . ? 
C11 C12 V1 69.87(6) . . ? 
C13 C12 H12A 125.0 . . ? 
C11 C12 H12A 125.0 . . ? 
V1 C12 H12A 122.5 . . ? 
C14 C13 C12 107.52(10) . . ? 
C14 C13 V1 71.99(7) . . ? 
C12 C13 V1 69.32(6) . . ? 
C14 C13 H13A 126.2 . . ? 
C12 C13 H13A 126.2 . . ? 
V1 C13 H13A 124.1 . . ? 
C15 C14 C13 107.88(11) . . ? 
C15 C14 V1 69.38(6) . . ? 
C13 C14 V1 72.01(7) . . ? 
C15 C14 H14A 126.1 . . ? 
C13 C14 H14A 126.1 . . ? 
V1 C14 H14A 124.2 . . ? 
C14 C15 C11 109.80(10) . . ? 
C14 C15 V1 74.15(7) . . ? 
C11 C15 V1 69.85(6) . . ? 
C14 C15 H15A 125.1 . . ? 
C11 C15 H15A 125.1 . . ? 
V1 C15 H15A 122.5 . . ? 
C27 C21 C22 124.78(11) . . ? 
C27 C21 B1 112.58(10) . . ? 
C22 C21 B1 112.06(10) . . ? 
C27 C21 V1 72.62(7) . . ? 
C22 C21 V1 72.74(7) . . ? 
B1 C21 V1 94.98(7) . . ? 
C23 C22 C21 129.74(11) . . ? 
C23 C22 V1 72.60(7) . . ? 
C21 C22 V1 68.23(6) . . ? 
C23 C22 H22A 115.1 . . ? 
C21 C22 H22A 115.1 . . ? 
V1 C22 H22A 142.1 . . ? 
C24 C23 C22 129.68(11) . . ? 
C24 C23 V1 72.12(7) . . ? 
C22 C23 V1 69.60(6) . . ? 
C24 C23 H23A 115.2 . . ? 
C22 C23 H23A 115.2 . . ? 
V1 C23 H23A 140.5 . . ? 
C23 C24 C25 127.69(11) . . ? 
C23 C24 V1 70.81(7) . . ? 
C25 C24 V1 71.29(7) . . ? 
C23 C24 H24A 116.2 . . ? 
C25 C24 H24A 116.2 . . ? 
V1 C24 H24A 137.5 . . ? 
C24 C25 C26 127.92(12) . . ? 
C24 C25 V1 71.65(7) . . ? 
C26 C25 V1 70.60(7) . . ? 
C24 C25 H25A 116.0 . . ? 
C26 C25 H25A 116.0 . . ? 
V1 C25 H25A 137.5 . . ? 
C25 C26 C27 129.69(12) . . ? 
C25 C26 V1 72.11(7) . . ? 
C27 C26 V1 69.67(7) . . ? 
C25 C26 H26A 115.2 . . ? 
C27 C26 H26A 115.2 . . ? 
V1 C26 H26A 140.4 . . ? 
C26 C27 C21 129.44(11) . . ? 
C26 C27 V1 72.38(7) . . ? 
C21 C27 V1 68.38(6) . . ? 
C26 C27 H27A 115.3 . . ? 
C21 C27 H27A 115.3 . . ? 
V1 C27 H27A 141.8 . . ? 
Si2 C31 H31A 109.5 . . ? 
Si2 C31 H31B 109.5 . . ? 
H31A C31 H31B 109.5 . . ? 
Si2 C31 H31C 109.5 . . ? 
H31A C31 H31C 109.5 . . ? 
H31B C31 H31C 109.5 . . ? 
Si2 C32 H32A 109.5 . . ? 
Si2 C32 H32B 109.5 . . ? 
H32A C32 H32B 109.5 . . ? 
Si2 C32 H32C 109.5 . . ? 
H32A C32 H32C 109.5 . . ? 
H32B C32 H32C 109.5 . . ? 
Si2 C33 H33A 109.5 . . ? 
Si2 C33 H33B 109.5 . . ? 
H33A C33 H33B 109.5 . . ? 
Si2 C33 H33C 109.5 . . ? 
H33A C33 H33C 109.5 . . ? 
H33B C33 H33C 109.5 . . ? 
Si1 C41 H41A 109.5 . . ? 
Si1 C41 H41B 109.5 . . ? 
H41A C41 H41B 109.5 . . ? 
Si1 C41 H41C 109.5 . . ? 
H41A C41 H41C 109.5 . . ? 
H41B C41 H41C 109.5 . . ? 
Si1 C42 H42A 109.5 . . ? 
Si1 C42 H42B 109.5 . . ? 
H42A C42 H42B 109.5 . . ? 
Si1 C42 H42C 109.5 . . ? 
H42A C42 H42C 109.5 . . ? 
H42B C42 H42C 109.5 . . ? 
Si1 C43 H43A 109.5 . . ? 
Si1 C43 H43B 109.5 . . ? 
H43A C43 H43B 109.5 . . ? 
Si1 C43 H43C 109.5 . . ? 
H43A C43 H43C 109.5 . . ? 
H43B C43 H43C 109.5 . . ? 
 
loop_ 
 _geom_torsion_atom_site_label_1 
 _geom_torsion_atom_site_label_2 
 _geom_torsion_atom_site_label_3 
 _geom_torsion_atom_site_label_4 
 _geom_torsion 
 _geom_torsion_site_symmetry_1 
 _geom_torsion_site_symmetry_2 
 _geom_torsion_site_symmetry_3 
 _geom_torsion_site_symmetry_4 
 _geom_torsion_publ_flag 
C21 B1 N1 Si1 -4.36(18) . . . . ? 
C11 B1 N1 Si1 176.28(9) . . . . ? 
C21 B1 N1 Si2 -177.92(10) . . . . ? 
C11 B1 N1 Si2 2.72(16) . . . . ? 
C41 Si1 N1 B1 5.54(12) . . . . ? 
C42 Si1 N1 B1 -113.07(11) . . . . ? 
C43 Si1 N1 B1 125.02(11) . . . . ? 
C41 Si1 N1 Si2 178.71(8) . . . . ? 
C42 Si1 N1 Si2 60.10(10) . . . . ? 
C43 Si1 N1 Si2 -61.81(10) . . . . ? 
B1 N1 Si2 C31 63.23(10) . . . . ? 
Si1 N1 Si2 C31 -110.32(7) . . . . ? 
B1 N1 Si2 C33 -60.68(10) . . . . ? 
Si1 N1 Si2 C33 125.77(7) . . . . ? 
B1 N1 Si2 C32 -178.03(9) . . . . ? 
Si1 N1 Si2 C32 8.41(9) . . . . ? 
N1 B1 C11 C15 -111.45(14) . . . . ? 
C21 B1 C11 C15 69.05(13) . . . . ? 
N1 B1 C11 C12 108.77(14) . . . . ? 
C21 B1 C11 C12 -70.73(13) . . . . ? 
N1 B1 C11 V1 178.62(11) . . . . ? 
C21 B1 C11 V1 -0.88(8) . . . . ? 
C21 V1 C11 C15 -122.95(7) . . . . ? 
C27 V1 C11 C15 -87.07(7) . . . . ? 
C22 V1 C11 C15 -158.60(7) . . . . ? 
C26 V1 C11 C15 -66.50(8) . . . . ? 
C23 V1 C11 C15 -179.01(6) . . . . ? 
C25 V1 C11 C15 -64.12(14) . . . . ? 
C24 V1 C11 C15 178.74(11) . . . . ? 
C12 V1 C11 C15 112.61(9) . . . . ? 
C14 V1 C11 C15 35.98(6) . . . . ? 
C13 V1 C11 C15 76.69(7) . . . . ? 
C21 V1 C11 C12 124.44(8) . . . . ? 
C27 V1 C11 C12 160.32(7) . . . . ? 
C22 V1 C11 C12 88.79(7) . . . . ? 
C26 V1 C11 C12 -179.11(7) . . . . ? 
C23 V1 C11 C12 68.38(8) . . . . ? 
C25 V1 C11 C12 -176.73(11) . . . . ? 
C24 V1 C11 C12 66.14(14) . . . . ? 
C15 V1 C11 C12 -112.61(9) . . . . ? 
C14 V1 C11 C12 -76.63(7) . . . . ? 
C13 V1 C11 C12 -35.92(7) . . . . ? 
C21 V1 C11 B1 0.70(6) . . . . ? 
C27 V1 C11 B1 36.58(7) . . . . ? 
C22 V1 C11 B1 -34.96(7) . . . . ? 
C26 V1 C11 B1 57.15(8) . . . . ? 
C23 V1 C11 B1 -55.37(8) . . . . ? 
C25 V1 C11 B1 59.52(15) . . . . ? 
C24 V1 C11 B1 -57.61(14) . . . . ? 
C12 V1 C11 B1 -123.75(10) . . . . ? 
C15 V1 C11 B1 123.64(10) . . . . ? 
C14 V1 C11 B1 159.62(8) . . . . ? 
C13 V1 C11 B1 -159.67(8) . . . . ? 
C15 C11 C12 C13 -1.68(12) . . . . ? 
B1 C11 C12 C13 143.99(11) . . . . ? 
V1 C11 C12 C13 63.77(8) . . . . ? 
C15 C11 C12 V1 -65.45(7) . . . . ? 
B1 C11 C12 V1 80.22(10) . . . . ? 
C21 V1 C12 C13 -170.39(7) . . . . ? 
C27 V1 C12 C13 -142.63(7) . . . . ? 
C22 V1 C12 C13 151.04(7) . . . . ? 
C11 V1 C12 C13 -118.78(10) . . . . ? 
C26 V1 C12 C13 -116.67(13) . . . . ? 
C23 V1 C12 C13 115.74(7) . . . . ? 
C25 V1 C12 C13 56.78(19) . . . . ? 
C24 V1 C12 C13 87.43(8) . . . . ? 
C15 V1 C12 C13 -78.60(7) . . . . ? 
C14 V1 C12 C13 -36.72(7) . . . . ? 
C21 V1 C12 C11 -51.61(7) . . . . ? 
C27 V1 C12 C11 -23.85(9) . . . . ? 
C22 V1 C12 C11 -90.18(7) . . . . ? 
C26 V1 C12 C11 2.11(16) . . . . ? 
C23 V1 C12 C11 -125.48(7) . . . . ? 
C25 V1 C12 C11 175.56(15) . . . . ? 
C24 V1 C12 C11 -153.79(7) . . . . ? 
C15 V1 C12 C11 40.18(7) . . . . ? 
C14 V1 C12 C11 82.06(7) . . . . ? 
C13 V1 C12 C11 118.78(10) . . . . ? 
C11 C12 C13 C14 1.14(13) . . . . ? 
V1 C12 C13 C14 62.24(8) . . . . ? 
C11 C12 C13 V1 -61.10(8) . . . . ? 
C21 V1 C13 C14 -104.85(8) . . . . ? 
C27 V1 C13 C14 -49.25(12) . . . . ? 
C22 V1 C13 C14 -151.32(7) . . . . ? 
C11 V1 C13 C14 -80.17(8) . . . . ? 
C26 V1 C13 C14 24.97(12) . . . . ? 
C23 V1 C13 C14 166.15(7) . . . . ? 
C25 V1 C13 C14 80.94(9) . . . . ? 
C24 V1 C13 C14 124.48(8) . . . . ? 
C12 V1 C13 C14 -117.46(10) . . . . ? 
C15 V1 C13 C14 -37.01(7) . . . . ? 
C21 V1 C13 C12 12.61(9) . . . . ? 
C27 V1 C13 C12 68.20(11) . . . . ? 
C22 V1 C13 C12 -33.87(8) . . . . ? 
C11 V1 C13 C12 37.28(7) . . . . ? 
C26 V1 C13 C12 142.43(9) . . . . ? 
C23 V1 C13 C12 -76.39(8) . . . . ? 
C25 V1 C13 C12 -161.60(7) . . . . ? 
C24 V1 C13 C12 -118.06(7) . . . . ? 
C15 V1 C13 C12 80.45(7) . . . . ? 
C14 V1 C13 C12 117.46(10) . . . . ? 
C12 C13 C14 C15 -0.11(13) . . . . ? 
V1 C13 C14 C15 60.41(8) . . . . ? 
C12 C13 C14 V1 -60.52(8) . . . . ? 
C21 V1 C14 C15 -11.08(10) . . . . ? 
C27 V1 C14 C15 34.31(9) . . . . ? 
C22 V1 C14 C15 -65.79(11) . . . . ? 
C11 V1 C14 C15 -37.35(7) . . . . ? 
C26 V1 C14 C15 76.38(8) . . . . ? 
C23 V1 C14 C15 -143.02(9) . . . . ? 
C25 V1 C14 C15 117.73(8) . . . . ? 
C24 V1 C14 C15 160.69(8) . . . . ? 
C12 V1 C14 C15 -80.60(8) . . . . ? 
C13 V1 C14 C15 -117.85(11) . . . . ? 
C21 V1 C14 C13 106.77(8) . . . . ? 
C27 V1 C14 C13 152.15(7) . . . . ? 
C22 V1 C14 C13 52.06(11) . . . . ? 
C11 V1 C14 C13 80.50(8) . . . . ? 
C26 V1 C14 C13 -165.78(7) . . . . ? 
C23 V1 C14 C13 -25.17(13) . . . . ? 
C25 V1 C14 C13 -124.42(8) . . . . ? 
C24 V1 C14 C13 -81.47(9) . . . . ? 
C12 V1 C14 C13 37.25(7) . . . . ? 
C15 V1 C14 C13 117.85(11) . . . . ? 
C13 C14 C15 C11 -0.96(13) . . . . ? 
V1 C14 C15 C11 61.13(8) . . . . ? 
C13 C14 C15 V1 -62.09(8) . . . . ? 
C12 C11 C15 C14 1.61(13) . . . . ? 
B1 C11 C15 C14 -144.10(10) . . . . ? 
V1 C11 C15 C14 -63.81(8) . . . . ? 
C12 C11 C15 V1 65.41(7) . . . . ? 
B1 C11 C15 V1 -80.29(10) . . . . ? 
C21 V1 C15 C14 171.47(8) . . . . ? 
C27 V1 C15 C14 -150.11(8) . . . . ? 
C22 V1 C15 C14 144.63(7) . . . . ? 
C11 V1 C15 C14 118.64(10) . . . . ? 
C26 V1 C15 C14 -114.79(8) . . . . ? 
C23 V1 C15 C14 121.01(13) . . . . ? 
C25 V1 C15 C14 -87.11(9) . . . . ? 
C24 V1 C15 C14 -59.68(19) . . . . ? 
C12 V1 C15 C14 78.43(8) . . . . ? 
C13 V1 C15 C14 36.53(7) . . . . ? 
C21 V1 C15 C11 52.83(7) . . . . ? 
C27 V1 C15 C11 91.24(7) . . . . ? 
C22 V1 C15 C11 25.99(8) . . . . ? 
C26 V1 C15 C11 126.57(7) . . . . ? 
C23 V1 C15 C11 2.36(15) . . . . ? 
C25 V1 C15 C11 154.25(7) . . . . ? 
C24 V1 C15 C11 -178.32(14) . . . . ? 
C12 V1 C15 C11 -40.21(6) . . . . ? 
C14 V1 C15 C11 -118.64(10) . . . . ? 
C13 V1 C15 C11 -82.12(7) . . . . ? 
N1 B1 C21 C27 108.21(14) . . . . ? 
C11 B1 C21 C27 -72.31(11) . . . . ? 
N1 B1 C21 C22 -105.18(14) . . . . ? 
C11 B1 C21 C22 74.30(11) . . . . ? 
N1 B1 C21 V1 -178.56(12) . . . . ? 
C11 B1 C21 V1 0.92(9) . . . . ? 
C22 V1 C21 C27 -136.31(10) . . . . ? 
C11 V1 C21 C27 111.42(7) . . . . ? 
C26 V1 C21 C27 -20.21(7) . . . . ? 
C23 V1 C21 C27 -116.39(7) . . . . ? 
C25 V1 C21 C27 -49.78(7) . . . . ? 
C24 V1 C21 C27 -87.09(7) . . . . ? 
C12 V1 C21 C27 141.96(7) . . . . ? 
C15 V1 C21 C27 80.34(7) . . . . ? 
C14 V1 C21 C27 86.91(8) . . . . ? 
C13 V1 C21 C27 134.47(7) . . . . ? 
C27 V1 C21 C22 136.31(10) . . . . ? 
C11 V1 C21 C22 -112.27(7) . . . . ? 
C26 V1 C21 C22 116.11(7) . . . . ? 
C23 V1 C21 C22 19.92(7) . . . . ? 
C25 V1 C21 C22 86.53(7) . . . . ? 
C24 V1 C21 C22 49.22(7) . . . . ? 
C12 V1 C21 C22 -81.73(7) . . . . ? 
C15 V1 C21 C22 -143.35(7) . . . . ? 
C14 V1 C21 C22 -136.77(7) . . . . ? 
C13 V1 C21 C22 -89.22(8) . . . . ? 
C27 V1 C21 B1 -112.12(9) . . . . ? 
C22 V1 C21 B1 111.57(10) . . . . ? 
C11 V1 C21 B1 -0.70(7) . . . . ? 
C26 V1 C21 B1 -132.32(8) . . . . ? 
C23 V1 C21 B1 131.49(8) . . . . ? 
C25 V1 C21 B1 -161.90(7) . . . . ? 
C24 V1 C21 B1 160.79(7) . . . . ? 
C12 V1 C21 B1 29.84(7) . . . . ? 
C15 V1 C21 B1 -31.78(7) . . . . ? 
C14 V1 C21 B1 -25.20(9) . . . . ? 
C13 V1 C21 B1 22.35(9) . . . . ? 
C27 C21 C22 C23 12.03(19) . . . . ? 
B1 C21 C22 C23 -129.76(13) . . . . ? 
V1 C21 C22 C23 -41.35(12) . . . . ? 
C27 C21 C22 V1 53.38(10) . . . . ? 
B1 C21 C22 V1 -88.40(8) . . . . ? 
C21 V1 C22 C23 147.83(10) . . . . ? 
C27 V1 C22 C23 120.55(8) . . . . ? 
C11 V1 C22 C23 -150.87(7) . . . . ? 
C26 V1 C22 C23 88.39(7) . . . . ? 
C25 V1 C22 C23 51.07(7) . . . . ? 
C24 V1 C22 C23 20.45(7) . . . . ? 
C12 V1 C22 C23 -112.96(7) . . . . ? 
C15 V1 C22 C23 -166.48(7) . . . . ? 
C14 V1 C22 C23 -125.85(9) . . . . ? 
C13 V1 C22 C23 -93.59(8) . . . . ? 
C27 V1 C22 C21 -27.28(7) . . . . ? 
C11 V1 C22 C21 61.30(7) . . . . ? 
C26 V1 C22 C21 -59.44(7) . . . . ? 
C23 V1 C22 C21 -147.83(10) . . . . ? 
C25 V1 C22 C21 -96.76(7) . . . . ? 
C24 V1 C22 C21 -127.38(8) . . . . ? 
C12 V1 C22 C21 99.21(7) . . . . ? 
C15 V1 C22 C21 45.69(8) . . . . ? 
C14 V1 C22 C21 86.32(10) . . . . ? 
C13 V1 C22 C21 118.58(7) . . . . ? 
C21 C22 C23 C24 -2.7(2) . . . . ? 
V1 C22 C23 C24 -42.76(12) . . . . ? 
C21 C22 C23 V1 40.02(11) . . . . ? 
C21 V1 C23 C24 126.22(8) . . . . ? 
C27 V1 C23 C24 91.87(7) . . . . ? 
C22 V1 C23 C24 146.70(11) . . . . ? 
C11 V1 C23 C24 -178.62(7) . . . . ? 
C26 V1 C23 C24 53.93(8) . . . . ? 
C25 V1 C23 C24 22.59(7) . . . . ? 
C12 V1 C23 C24 -142.84(7) . . . . ? 
C15 V1 C23 C24 179.68(11) . . . . ? 
C14 V1 C23 C24 -90.50(11) . . . . ? 
C13 V1 C23 C24 -106.53(8) . . . . ? 
C21 V1 C23 C22 -20.49(7) . . . . ? 
C27 V1 C23 C22 -54.84(7) . . . . ? 
C11 V1 C23 C22 34.67(8) . . . . ? 
C26 V1 C23 C22 -92.77(7) . . . . ? 
C25 V1 C23 C22 -124.11(8) . . . . ? 
C24 V1 C23 C22 -146.70(11) . . . . ? 
C12 V1 C23 C22 70.46(7) . . . . ? 
C15 V1 C23 C22 32.98(15) . . . . ? 
C14 V1 C23 C22 122.80(10) . . . . ? 
C13 V1 C23 C22 106.77(7) . . . . ? 
C22 C23 C24 C25 -3.8(2) . . . . ? 
V1 C23 C24 C25 -45.71(12) . . . . ? 
C22 C23 C24 V1 41.96(12) . . . . ? 
C21 V1 C24 C23 -51.05(8) . . . . ? 
C27 V1 C24 C23 -90.06(7) . . . . ? 
C22 V1 C24 C23 -20.82(7) . . . . ? 
C11 V1 C24 C23 3.18(15) . . . . ? 
C26 V1 C24 C23 -120.69(8) . . . . ? 
C25 V1 C24 C23 -143.27(11) . . . . ? 
C12 V1 C24 C23 50.21(9) . . . . ? 
C15 V1 C24 C23 -179.59(14) . . . . ? 
C14 V1 C24 C23 135.32(8) . . . . ? 
C13 V1 C24 C23 93.35(8) . . . . ? 
C21 V1 C24 C25 92.22(8) . . . . ? 
C27 V1 C24 C25 53.21(8) . . . . ? 
C22 V1 C24 C25 122.45(8) . . . . ? 
C11 V1 C24 C25 146.45(11) . . . . ? 
C26 V1 C24 C25 22.58(7) . . . . ? 
C23 V1 C24 C25 143.27(11) . . . . ? 
C12 V1 C24 C25 -166.52(7) . . . . ? 
C15 V1 C24 C25 -36.32(19) . . . . ? 
C14 V1 C24 C25 -81.41(9) . . . . ? 
C13 V1 C24 C25 -123.38(8) . . . . ? 
C23 C24 C25 C26 0.1(2) . . . . ? 
V1 C24 C25 C26 -45.41(12) . . . . ? 
C23 C24 C25 V1 45.54(12) . . . . ? 
C21 V1 C25 C24 -92.13(8) . . . . ? 
C27 V1 C25 C24 -122.56(8) . . . . ? 
C22 V1 C25 C24 -53.13(8) . . . . ? 
C11 V1 C25 C24 -146.81(11) . . . . ? 
C26 V1 C25 C24 -143.44(11) . . . . ? 
C23 V1 C25 C24 -22.59(7) . . . . ? 
C12 V1 C25 C24 40.5(2) . . . . ? 
C15 V1 C25 C24 167.75(7) . . . . ? 
C14 V1 C25 C24 125.01(7) . . . . ? 
C13 V1 C25 C24 83.43(9) . . . . ? 
C21 V1 C25 C26 51.31(8) . . . . ? 
C27 V1 C25 C26 20.88(7) . . . . ? 
C22 V1 C25 C26 90.31(8) . . . . ? 
C11 V1 C25 C26 -3.37(16) . . . . ? 
C23 V1 C25 C26 120.85(8) . . . . ? 
C24 V1 C25 C26 143.44(11) . . . . ? 
C12 V1 C25 C26 -176.07(15) . . . . ? 
C15 V1 C25 C26 -48.81(10) . . . . ? 
C14 V1 C25 C26 -91.55(8) . . . . ? 
C13 V1 C25 C26 -133.13(8) . . . . ? 
C24 C25 C26 C27 3.7(2) . . . . ? 
V1 C25 C26 C27 -42.07(12) . . . . ? 
C24 C25 C26 V1 45.78(12) . . . . ? 
C21 V1 C26 C25 -125.94(8) . . . . ? 
C27 V1 C26 C25 -146.64(11) . . . . ? 
C22 V1 C26 C25 -91.48(8) . . . . ? 
C11 V1 C26 C25 178.53(7) . . . . ? 
C23 V1 C26 C25 -53.68(8) . . . . ? 
C24 V1 C26 C25 -22.46(7) . . . . ? 
C12 V1 C26 C25 177.03(11) . . . . ? 
C15 V1 C26 C25 143.52(8) . . . . ? 
C14 V1 C26 C25 107.45(8) . . . . ? 
C13 V1 C26 C25 91.74(11) . . . . ? 
C21 V1 C26 C27 20.70(7) . . . . ? 
C22 V1 C26 C27 55.16(7) . . . . ? 
C11 V1 C26 C27 -34.83(9) . . . . ? 
C23 V1 C26 C27 92.96(7) . . . . ? 
C25 V1 C26 C27 146.64(11) . . . . ? 
C24 V1 C26 C27 124.18(8) . . . . ? 
C12 V1 C26 C27 -36.34(16) . . . . ? 
C15 V1 C26 C27 -69.84(8) . . . . ? 
C14 V1 C26 C27 -105.91(7) . . . . ? 
C13 V1 C26 C27 -121.62(9) . . . . ? 
C25 C26 C27 C21 2.5(2) . . . . ? 
V1 C26 C27 C21 -40.37(11) . . . . ? 
C25 C26 C27 V1 42.85(13) . . . . ? 
C22 C21 C27 C26 -11.82(19) . . . . ? 
B1 C21 C27 C26 129.80(13) . . . . ? 
V1 C21 C27 C26 41.61(12) . . . . ? 
C22 C21 C27 V1 -53.43(10) . . . . ? 
B1 C21 C27 V1 88.19(8) . . . . ? 
C21 V1 C27 C26 -147.45(10) . . . . ? 
C22 V1 C27 C26 -120.15(8) . . . . ? 
C11 V1 C27 C26 150.60(7) . . . . ? 
C23 V1 C27 C26 -88.25(8) . . . . ? 
C25 V1 C27 C26 -20.56(7) . . . . ? 
C24 V1 C27 C26 -51.14(8) . . . . ? 
C12 V1 C27 C26 164.98(7) . . . . ? 
C15 V1 C27 C26 112.72(8) . . . . ? 
C14 V1 C27 C26 93.11(8) . . . . ? 
C13 V1 C27 C26 123.41(9) . . . . ? 
C22 V1 C27 C21 27.30(6) . . . . ? 
C11 V1 C27 C21 -61.95(7) . . . . ? 
C26 V1 C27 C21 147.45(10) . . . . ? 
C23 V1 C27 C21 59.20(7) . . . . ? 
C25 V1 C27 C21 126.89(8) . . . . ? 
C24 V1 C27 C21 96.31(7) . . . . ? 
C12 V1 C27 C21 -47.57(8) . . . . ? 
C15 V1 C27 C21 -99.83(7) . . . . ? 
C14 V1 C27 C21 -119.44(7) . . . . ? 
C13 V1 C27 C21 -89.14(10) . . . . ? 
 
_diffrn_measured_fraction_theta_max    0.864 
_diffrn_reflns_theta_full              26.00 
_diffrn_measured_fraction_theta_full   0.997 
_refine_diff_density_max    0.623 
_refine_diff_density_min   -0.543 
_refine_diff_density_rms    0.072 
